# **Multifaceted functions of Rab23 on primary cilium and Hedgehog signaling-mediated granule cell proliferation**

CHH Hor<sup>\*1,2</sup>, WY Leong<sup>2</sup>, and ELK Goh<sup>\*2,3,4,5</sup>

Affiliations:

<sup>1</sup>Department of Chemistry, Research Cluster on Health and Drug Discovery, Faculty of Science, Hong Kong Baptist University, Kowloon Tong, Hong Kong SAR

<sup>2</sup>Neuroscience Academic Clinical Programme, Duke-NUS Medical School, Singapore

<sup>3</sup>Department of Research, National Neuroscience Institute, Singapore

<sup>4</sup>Neuroscience and Mental Health Faculty, Lee Kong Chian School of Medicine, Nanyang Technological University, Singapore

<sup>5</sup>KK Research Center, KK Women's and Children's Hospital, Singapore

\*Co-corresponding authors

**Email:** [Eyleen\\_Goh@nni.com.sg](mailto:Eyleen_Goh@nni.com.sg); [catherinehor@hkbu.edu.hk](mailto:catherinehor@hkbu.edu.hk)

Running title: Rab23 in hedgehog signaling and cerebellar development

Key words: Ciliary signaling, Sonic hedgehog, Primary cilium, Rab GTPase, Ciliogenesis, Medulloblastoma

Number of Figures: 6

## **Conflict of Interest**

The authors declare no conflict of interest.

## Abstract

Sonic Hedgehog (Shh) signaling from the primary cilium drives cerebellar granule cell precursor (GCP) proliferation. Mutations of hedgehog (Hh) pathway repressors could cause medulloblastoma, the most prevalent and malignant childhood brain tumor that arises from aberrant GCP proliferation. We demonstrate that brain-specific knockout of a Shh pathway repressor *Rab23* in mice caused mis-patterning of cerebellar folia and elevated GCP proliferation during early development, but with no prevalent occurrence of medulloblastoma at adult stage. Strikingly, *Rab23*-depleted GCPs exhibited up-regulated basal level of Shh pathway activities despite reduced ciliation, and were desensitized against stimulations by Shh and Smoothed (Smo) agonist in primary GCP culture. These results illustrate dual functions of *Rab23* in repressing the basal level of Shh signaling, while facilitating Shh signal transduction via Shh/Smo on primary cilium. Collectively, our findings unravel instrumental roles of *Rab23* in GCP proliferation and ciliogenesis. *Rab23*'s potentiation of Shh signaling pathway through the primary cilium and Smo, suggests a potential new therapeutic for Smo/primary cilium-driven medulloblastoma.

## Author Summary

C.H.H conceived, designed, lead, and performed all *in vitro* and *in vivo* experiments, analyzed data and wrote the manuscript. W.Y performed QPCR experiments and primary GCP cultures and analyzed data. E.L.G conceived and directed the study.

## 1 **Introduction**

2

3 Cerebellar development in mammals is highly dependent on Shh signaling. In  
4 particular, Shh signaling dictates the proliferation of granule cell precursors (GCP)  
5 (1,2). GCPs give rise to granule neurons, the most abundant neuronal type in the brain.  
6 In the developing cerebellum, GCPs receive mitotic signals from Shh ligands released  
7 from the neighboring Purkinje cells to sustain its proliferation (1,2). Besides paracrine  
8 Shh signaling, GCPs were also capable of self-regulated autocrine-induced cell  
9 proliferation (3). Perturbation of Shh pathway activity during early embryonic or  
10 postnatal development results in cerebellar dysplasia, hypoplasia as well as malignant  
11 childhood brain tumor medulloblastoma (2,4–7). For example, genetic mutations of  
12 Shh signaling components such as *Patched (PTCH)*, *Smoothed (SMO)*, *Gpr161* or  
13 *Suppressor of Fused (SUFU)* are known to lead to the formation of medulloblastoma  
14 (8–11)(12).

15

16 In the past decade, emergence of primary cilium as an indispensable organelle for Shh  
17 signal transduction has facilitated discoveries that recognized the seminal roles of  
18 primary cilium in cerebellar development and medulloblastoma formation. The primary  
19 cilium is a non-motile cilium found on the surface of nearly every cell. It functions  
20 primarily as an “antenna” on the cell membrane to receive and transduce extracellular  
21 signals. In the Shh pathway, Shh ligand binds to the Ptch receptor to release its  
22 suppression of Smo on the cell membrane. This subsequently triggers Smo and  
23 cytosolic factors such as the Gli transcription factors and SuFu to interact within the  
24 primary cilium before translocating into the nucleus to activate Shh downstream target  
25 genes (13–15). Although the exact molecular mechanism and trafficking cargoes that

26 mediate dynamic ciliary entry and exit of Shh signaling components remain  
27 incompletely understood, it has been well established that Shh signal transduction is  
28 inevitably deregulated in the absence of a functional primary cilium. For instance,  
29 knockout (KO) of genes known to be required for primary cilium formation (i.e. *Kif3a*  
30 or *Ift88*) diminished Shh activities in the cerebellum and contributed to the  
31 manifestation of cerebellar hypoplasia and distorted foliation due to substantial  
32 shrinkage of granule cell precursors pool (16,17).

33

34 Intriguingly, recent findings have revealed that the primary cilium could exert both  
35 inducing or suppressing forces on Shh pathway and cancer progression (15,18,19).  
36 Depending on the pathogenic origin of the medulloblastoma, primary cilia could  
37 potentiate tumor growth driven by Smo, and on the other hand, inhibit tumor growth  
38 driven by Gli2 (18). Adding to the complexity of the tumor biology, the same study  
39 also showed that there are ciliated and non-ciliated sub-categories of medulloblastoma,  
40 with the ones bearing primary cilia often associated with increased Shh and Wnt  
41 pathway activities, whereas those without cilia do not exhibit Shh or Wnt pathway  
42 activation (18). Given the opposing functions of primary cilium on Shh pathway-  
43 mediated tumor progression, as well as the heterogeneity in ciliation capacity among  
44 the tumor cells; the multifaceted functions of primary cilium might underlies variable  
45 patients' responses to Smo-specific drug, Vismodegib treatment in the clinical trials  
46 that targets Shh-subtype medulloblastoma (20,21,22). Therefore, further insights on the  
47 interaction between primary cilium and the Shh pathway, and their roles in GCP  
48 proliferation would lay critical foundation for further development of effective  
49 intervention for medulloblastoma.

50

51 Rab23 is a brain-enriched small GTPase (21) known to antagonize the Shh pathway *in*  
52 *vivo*, as evidenced by developmental mouse genetic studies. In humans, mutations of  
53 *RAB23* cause Carpenter syndrome, an autosomal recessive disorder characterized by  
54 aberrant skull fusion, polydactyly and branchyductyly. Other variable developmental  
55 abnormalities including heart defect, genu valgum, cornea defect, umbilical hernia,  
56 obesity, developmental delay, as well as central nervous system (CNS)-related  
57 conditions including cerebral and cerebellar malformations, hydrocephaly, intellectual  
58 disability and schizophrenia (22–29). In mouse, the *Rab23*-encoding *open brain (opb)*  
59 null allele mutant exhibited embryonic lethality at mid-gestation stage, exencephaly  
60 and ectopic neural tube ventralization (30,31), which largely recapitulated the  
61 phenotypes of other Shh repressor mutants such as *Patched1 (Ptch1)* and *Suppressor*  
62 *of fused (Sufu)* KOs (32–34). Nonetheless, owing to the early embryonic lethality of  
63 *Rab23*-null mutant in mouse, true implications of Rab23 in Shh signaling-mediated  
64 CNS development beyond the mid-gestation stage are not known.

65

66 Genetic study revealed that *Rab23* represses Hh activities via *Gli2* and promotes the  
67 proteolytic cleavage of *Gli3* into its cleaved repressor form (31). In addition, *Rab23*  
68 also appeared to regulate Hh pathway activity through *Smo*. Concomittant deletion of  
69 *Smo* in the *Rab23*-null mutant has partially weakened Shh activation level in the neural  
70 tube as compared to that of *Rab23* mutant (31). Besides, a molecular study in  
71 mammalian cell line model reported that Rab23 mediates the protein turnover dynamics  
72 of *Smo* in the primary cilium, although it was not clear as to how this may influence  
73 Shh pathway activity(35). Another *in vitro* study further revealed that Rab23  
74 antagonizes the nuclear translocation of *Gli1* transcription activator to impede Shh  
75 pathway activation (36). Taken together, these findings suggest that Rab23 casts

76 multiple actions in the modulation of Hh signaling cascade. However, how it  
77 orchestrates Shh pathway in the context of GCP proliferation and medulloblastoma  
78 formation remains to be determined.

79

80 Although independent studies have implicated the functions of *Rab23* in primary cilium  
81 formation and ciliary trafficking, its role in ciliogenesis remains obscure due to  
82 inconsistent observations from different cell types. For instance, overexpression of the  
83 dominant-negative form, Rab23DN perturbed ciliation in the immortalized retinal  
84 pigmented epithelial cells (37). Supporting this observation, a recent study has  
85 identified that the GDP-GTP exchange factors (GEF) of Rab23 namely Inturned and  
86 Fuzzy, were localized to the primary cilium at proximal end, and played essential role  
87 in the primary cilia formation of human and mouse cells(38). The same study  
88 demonstrated that depletion of GEF (i.e. Intu and Fuzz), or Rab23 perturbed primary  
89 cilium formation in culture IMCD3 cells. On the contrary, *Rab23*<sup>-/-</sup> mouse embryo  
90 showed unaltered node cilia during early development(39). Taken together, these data  
91 suggest that Rab23's action in the primary cilium formation is possibly operating in a  
92 context-dependent manner. In the IMCD3 cells that have morphologically normal  
93 primary cilium, Rab23 forms protein complex with Kif17 and Dopamine receptor 1  
94 (D1R), and it was required for their ciliary localization (40,41). These findings  
95 indicated that Rab23 plays crucial roles in ciliary protein targeting. Despite the known  
96 function of Rab23 in primary cilium formation and Hh signaling, as well as the long  
97 perceived function of primary cilium-dependent Hh signaling in GCP proliferation,  
98 whether Rab23 is required for the primary cilium formation in the CNS and cerebellar  
99 GCP is not known. Moreover, how Rab23 may mediate primary cilium-dependent Shh

100 signal transduction, and its impact on GCP proliferation and cerebellar development  
101 remain to be further characterized.

102

103 In this study, we demonstrate that conditional KO of *Rab23* in the developing mouse  
104 brain at E10.5 resulted in abnormal cerebellar foliation, as well as unexpected opposing  
105 changes in the cerebellar sizes and Shh activities during embryonic and postnatal  
106 cerebellar development. Interestingly, our data suggest that loss of *Rab23* did not casue  
107 medulloblastoma despite an increase in the basal level of Shh pathway activities and  
108 GCP proliferation. We found that KO of *Rab23* affected ciliation in GCP, and rendered  
109 the cells less responsive to pathway activation by Shh and Smo agonist. These results  
110 suggest that the *Rab23*-KO GCPs have an attenuated response to paracrine Shh stimuli  
111 from primary cilium. Taken together, we have uncovered novel functions of *Rab23* in  
112 GCP proliferation, acting both positively and negatively via Shh signaling. Our results  
113 indicate that *Rab23* represses basal level of Shh signaling pathway activities, while  
114 facilitates Smo-mediated Shh pathway activation in a primary cilium-dependent  
115 manner.

116

117

## 118 **Results**

119

### 120 ***Rab23* dictates proper cerebellar morphogenesis and development**

121 In order to investigate the functions of *Rab23* in central nervous system (CNS)  
122 development, mouse bearing Nestin-cre (*Nes*) was crossed with *Rab23-floxed* (42)  
123 homozygous mutant to achieve conditional knock-out (CKO) of *Rab23* in the neural  
124 progenitor cells at approximately embryonic (E) day 10.5. Gross morphological

125 examination of the whole brain isolated from Nes-CKO mutant revealed noticeable  
126 cerebellar enlargement at earlier developmental stages (i.e. postnatal (P) day one and  
127 four) but appeared smaller at later adult stage as compared to the control (*Rab23<sup>ff/ff</sup>*)  
128 counterpart (Fig. 1A-B, E, yellow asterisk). Histological examination of the mid-sagittal  
129 cerebellar sections by hematoxylin-eosin (H&E) staining revealed cerebellar dysplasia  
130 in Nes-CKO brains. This was consistently observed at P1, P4 and adult stages (Fig. 1C-  
131 D, F). Disrupted patterning of the cerebellar folia was more prominent at the caudal  
132 region. Moreover, the external granular layer (EGL) at the posterior lobules appeared  
133 thicker and disorganized as compared to the control group (Fig. 1C-D, red arrows). In  
134 the adult mutant, the posterior cerebellar folia were irregularly formed and lack  
135 distinctive laminar layering of molecular layer (ML), Purkinje cell layer (PCL) and  
136 internal granule layer (IGL) (Fig 1F). Taken together, these data indicate that a loss of  
137 *Rab23* resulted in defects in cerebellar folia patterning during postnatal CNS  
138 development.

139

#### 140 **Depletion of Rab23 disrupted cerebellar radial glial scaffold and innervations of** 141 **granule cells**

142 The disorganized laminar layering, as well as the cerebellar folia anomaly prompted  
143 further examination of the Bergmann glial (Bg) scaffold, which acts as the  
144 cytoarchitectural scaffold to aid in neuronal migration and lamination (43–45). We used  
145 antibodies against Nestin and glial fibrillary acidic protein (GFAP) to immunolabel  
146 radial glia and the Bg scaffold at early postnatal and later adult stages respectively. In  
147 the *Rab23<sup>ff/ff</sup>* (control) group, radial fibers of Bg at P1, P4 and P15 appeared  
148 perpendicularly aligned and extended from the cell bodies at the lower ML and PCL  
149 towards the pial surface of the cerebellum. In contrast, the processes of Nes-CKO



150 mutant Bg in the disrupted lobules appeared tangled and misaligned, with some of them  
151 unable to extend processes to the pial surface, thus indicating an impairment of the Bg  
152 scaffold (Fig. 2A-C). Additionally, hyperplastic lesion-like ectopic nuclei accumulation  
153 were detectable at the pial surface in P4 (Fig 2B, asterisk) and adult cerebellum (Fig.  
154 2D, white arrows). In line with this defect, the NeuN-positive granule cells in the adult  
155 mutant were aberrantly localized to the pial surface and the ML instead of the deeper  
156 IGL. In addition, a subpopulation of the granule cells was randomly scattered at the  
157 posterior region, concomitant with a loss of laminar structure. The cell soma of GFAP-  
158 positive astrocytes/Bg were also found to be ectopically misplaced at the pial surface  
159 and ML, indicating a misalignment of radial glial scaffold at the adult stage (Fig. 2D,  
160 D', D''). These data indicate that an abnormal glial scaffold in Nes-CKO mutants may  
161 hinder proper invagination and migration of granule cells to the deeper IGL during early  
162 postnatal cerebellar development.

163

164 Given the defective radial glial scaffold and ectopic accumulation of granule cells at  
165 the pial surface and ML, we asked if the inward radial migration of granule cell at the  
166 earlier embryonic and postnatal stages was affected. Anti-Pax6 antibody was used to  
167 immunolabel both amplifying granule cell precursors (GCP) transiently residing in the  
168 EGL (source of granule cells), and the early inwardly migrated post-mitotic granule  
169 cells in the granular layer at E15.5 (46). The Pax6-expressing granule cells in the  
170 control group were more well-dispersed and scattered further into the deeper granule  
171 layer. Conversely, *Rab23*-depleted granule cells appeared less dispersed and are largely  
172 confined to the region adjacent to the EGL (Fig. 3A, yellow dotted lines). Because all  
173 granule cells arise from the EGL and innervate the inner granular layer as they undergo  
174 maturation, we quantified the innervation/migration rate by counting the number of

175 Pax6-positive cells that have populated the inner granular layer (innervated) against  
176 total Pax6-positive cells. Indeed, the proportion of innervated granule cells in the Nes-  
177 CKO mutant appeared markedly reduced compared to the control counterpart (Fig. 3B),  
178 suggesting an impaired or delayed innervation. In addition, a two-hour EdU-pulse  
179 labeling assay was used to track all early innervated progenitor cells. The proportion of  
180 EdU-labelled cells that have innervated (from EGL – magenta arrows, and VZ – yellow  
181 arrows) the granular layer was scored against all EdU-labelled cells. Similarly, *Rab23*-  
182 depleted cells showed a lower percentage of innervated cells in the granular layer (Fig.  
183 3C).

184

185 For the postnatal stage, we examined the migration of granule cells by 48 hours EdU-  
186 pulse labelling for P5 to P7. The percentages of cell innervation in different lobules  
187 were then analyzed by quantifying the percentages of EdU-labelled cells residing in the  
188 EGL, ML and IGL of each lobule. In agreement with the results from the embryonic  
189 stage (Fig. 3A-C), the proportions of mutant cells reaching IGL were greatly reduced,  
190 concomitant with an increase in the percentage of cells that are accumulated in the EGL  
191 (Fig. 3D-E). Taken together, these data suggest that deletion of *Rab23* caused a  
192 misalignment of the radial glial scaffold, leading to perturbations in granule cells  
193 innervation and lamination. As a result, the cerebellar laminae and folia could not be  
194 properly formed during postnatal cerebellar development.

195

196 **Rab23-ablation caused thickened EGL and enhanced GCP proliferation, but no**  
197 **discernible tumorigenesis**

198 In view of the thickened EGL observed in H&E staining, as well as the enlarged  
199 cerebellum of Nes-CKO at P1 and P4, a more detailed analysis of cell proliferation is

200 warranted. We performed co-immunolabeling of Pax6 and Calbindin to visualized GCP  
201 and Purkinje cells respectively. At P1, there was an overall increase in the number of  
202 Pax6-expressing GCPs in the Nes-CKO mutant compared to the control. Besides, the  
203 Pax6-labelled EGL in Nes-CKO appeared greatly thickened, more so near the posterior  
204 folia (Fig. 4A, white asterisks). On the other hand, the Calbindin-expressing Purkinje  
205 cells in the mutant PCL appeared to be lower in density and more sparsely distributed  
206 as compared to the more densely aligned Purkinje cell layer in the control counterpart  
207 (Fig. 4B), implying a perturbed PCL lamination.

208

209 Two hours EdU-pulse labelling was performed on E15.5 and P4 animals to probe GCP  
210 proliferation in further details. Compared to the control, the pools of EdU-positive  
211 proliferative cells are substantially expanded in the EGL of Nes-CKO mutant at both  
212 time points (Fig. 4C-D, red and yellow double heads arrows), indicating aberrantly  
213 enhanced GCP proliferation during both embryonic and postnatal cerebellar  
214 development. These phenotypes were further confirmed by a quantification of EdU-  
215 positive nuclei in the EGL at E15.5, which revealed a significant up-regulation of  
216 proliferative cells in the mutant EGL as compared to the control group (Fig. 4E).  
217 Accordingly, another cell proliferation marker, *Ki67*, and a GCP-specific marker *Atoh1*,  
218 also showed markedly elevated expression levels in the cerebellar tissue of Nes-CKO  
219 mutants (Fig. 4F). Taken together, these data suggest that depletion of *Rab23*  
220 potentiated GCP proliferation during early cerebellar development. Excessive GCP  
221 proliferation often give rise to medulloblastoma (47)(48,49). Given this, one would  
222 expect the development of medulloblastoma at a later postnatal stage. However, we did  
223 not find detectable manifestation of medulloblastoma in adult mutant animals, despite

224 the occurrence of hyperplastic lesions-like tissue clumps at P4 (Fig. 1F, 2B-asterisk,  
225 D-white arrows).

226

### 227 **Shh signaling is differentially perturbed in the developing cerebellum**

228 Previous genetic studies have reported that *Rab23* negatively regulates Shh signaling  
229 (30,50). As Shh signaling is the key signaling pathway that modulates GCP  
230 proliferation (1,2,51,52), we reasoned that it is likely a main factor driving aberrant  
231 GCP proliferation in the *Rab23*-deficient cerebellum. To address this possibility, we  
232 examined the expressions of *Gli* transcription factors, which are downstream effectors  
233 of Shh signaling in CNS development. The Shh signaling activities in cerebellar tissue  
234 were examined in both embryonic E15.5 and late postnatal P15. In accordance with the  
235 increased CGP proliferation in Nes-CKO at E15.5 and P4, Shh signaling pathway  
236 activities were robustly up-regulated at E15.5, as shown by an increase in *Gli1* and *Gli2*  
237 expressions compared to the control group (Fig. 5A). Intriguingly, at P15, the  
238 expression level of *Gli1* transcripts was significantly down-regulated in the Nes-CKO  
239 mutant cerebellum, despite up-regulated levels of *Gli2*, *Gli3*, *Ki67* and *Atoh1* (Fig. 5B).  
240 Because *Gli1* activates Shh-regulated genes, and its expression is dependent on both  
241 *Gli2* and *Gli3*, it could serve as the ultimate readout of Shh signaling pathway activity  
242 (C Brian Bai & Joyner, 2001; C Brian Bai, Stephen, & Joyner, 2004; Lee, Platt,  
243 Censullo, & Ruiz i Altaba, 1997). We also compared the expression profile of *Gli1*  
244 transcripts at embryonic and postnatal stages. Compared to the control group which  
245 exhibited relatively unaltered *Gli1* transcript level between E15.5 and P15, the Nes-  
246 CKO mutant showed a significant reduction in *Gli1* transcript level at P15 compared to  
247 its embryonic stage (Fig. 5C). Given the perturbed Shh signaling pathway activities, we  
248 further examined if the *Shh* transcripts were affected. Interestingly, *Shh* transcripts level

249 in the Nes-CKO appeared largely unchanged at both developmental time points (Fig.  
250 5A-B), implying that the mutant cerebellar tissues are not short of Shh stimulants  
251 despite the greatly mis-patterned cerebellum. Taken together, these data show that the  
252 Shh signaling activities in the Nes-CKO mutants were initially enhanced during  
253 embryonic cerebellar patterning, but became down-regulated at later postnatal time  
254 point as compared to the control counterpart. Notably, this correlated well with the  
255 differential changes in the cerebellar size as aforementioned (Fig. 1A-B, E). Together,  
256 these results revealed that Shh signaling pathway activities were differentially  
257 perturbed as a result of Rab23 deficiency during embryonic and postnatal stages of  
258 cerebellar patterning.

259

260 **Rab23 could regulate Shh signaling in the GCP at basal level as well as in a cilium-**  
261 **dependent manner**

262 The alterations of Shh signaling pathway activities on GCP in the whole cerebellar  
263 tissues could be a secondary effect resulting from abnormal changes in the  
264 cellular/tissue composition. We ruled out this possibility by monitoring Shh signaling  
265 in primary GCP culture isolated from P7 cerebellar tissue. Primary culture data show  
266 that *Rab23*-KO GCP indeed exhibited elevated expressions of *Gli1* mRNA at the basal  
267 level, indicating an over-activation of Shh pathways in the Nes-Cre mutant GCP.  
268 Accordingly, primary culture of mutant GCP also displayed potentiated cell  
269 proliferation, as illustrated by the up-regulation of *Atoh1* and *Ki67*, as well as an  
270 increase in the percentage of EdU-positive proliferative cells (Fig. 6A-C). Furthermore,  
271 Shh pathway over-activation and cell proliferation were significantly inhibited by co-  
272 expressing *Rab23* wild-type cDNA, or its constitutive active form, *Rab23<sup>QL</sup>*, in the KO  
273 GCP (Fig. 6A-C), suggesting that the effects observed were indeed due to the loss-of

274 *Rab23* gene functions. Together, these results suggest a negative role for *Rab23* in  
275 regulating Shh signaling-mediated GCP proliferation.

276

277 Previous findings have demonstrated that primary cilium is required for Shh signaling-  
278 mediated CGP proliferation during cerebellar development (16,17). *Rab23* has also  
279 been reported to be involved in ciliogenesis and ciliary signaling in other cell types  
280 (40,41,56). Therefore, it is conceivable that the impact of *Rab23* on GCP proliferation  
281 was exerted through changes to the primary cilia. We examined primary cilia  
282 morphology in the E15.5 and P15 cerebellar GCP by immunolabeling of Arl13b, a  
283 primary cilium-specific marker. Interestingly, Arl13b immunostaining showed that the  
284 *Rab23*-depleted GCPs exhibited a significantly reduced number of cells bearing  
285 primary cilium, whereas nearly all GCPs in the control counterpart showed positive  
286 staining of Arl13b (Fig. 6E). This finding is further strengthened by the analysis of  
287 primary cilia in primary GCP culture isolated from P7 cerebellar tissues, whereby the  
288 *Rab23*-deleted GCPs in culture similarly displayed a significant reduction of ciliation,  
289 which could be reversed by co-expressing *Rab23* wild-type cDNA, or the constitutive  
290 active *Rab23QL* (Fig 6D). Taken together, our data provide the first indication that  
291 *Rab23* influences ciliogenesis in the cerebellar GCP *in vivo*. Importantly, these results  
292 also hinted at a novel cilium-dependent role of *Rab23* in coordinating Shh pathway and  
293 GCP proliferation.

294

295 Given the perturbations in primary cilia morphology, we hypothesized that *Rab23*-KO  
296 GCP may be compromised in primary cilium-dependent Shh signal transduction. In  
297 order to address this hypothesis, primary GCP cultures were subjected to Shh ligand  
298 stimulation *in vitro*. Despite its higher basal level of Shh signaling activities as

299 compared to control (Fig. 6A), *Rab23*-KO GCP showed markedly weaker response to  
300 Shh ligand stimulation, as illustrated by a lower fold-increase in the expression of *Gli1*  
301 mRNA as compared to the control counterpart (Fig. 6F). *Rab23*-KO GCPs also  
302 exhibited lower fold-enhancement in cell division as compared to the control group, in  
303 which the expression of *Ki67*, as well as *Atoh1* were both significantly lower than  
304 control group upon Shh ligand stimulation (Fig. 6F). To check if the Shh signaling  
305 occurs through Smo, GCP cultures were treated with a Smo agonist that promotes its  
306 localization to the cilium. Control GCPs exhibited robust elevation *Gli1* expression 24  
307 hours after SAG treatment (Fig. 6G). Conversely, *Rab23*-KO GCPs' response to SAG  
308 induction was significantly compromised, as shown by lower expression level of *Gli1*  
309 (Fig. 6G), thus implying a desensitization to Shh signaling at the level of primary cilium  
310 and Smo. Together, these data demonstrated that silencing *Rab23* impaired ciliation  
311 and GCP's response to Shh or Smo stimulations, thereby impeding Shh-mediated GCP  
312 proliferation. These suggest a novel positive role of *Rab23* in modulating primary  
313 cilium-dependent Shh signaling and GCP expansion during early cerebellar  
314 development.

315

## 316 **Discussion**

317

318 Fine tuning Shh signaling during cerebellar development is essential to facilitate a  
319 temporally and spatially-defined transit amplification of granule cell precursors (GCP)  
320 to ensure proper patterning and growth of the cerebellar folia (2,57–59). We have  
321 demonstrated here that *Rab23* has a role in the patterning and growth of cerebellar folia  
322 during early cerebellar development. Deletion of *Rab23* resulted in foliation anomalies  
323 due to dramatically perturbed radial glial scaffold formation, granule cells lamination

324 and GCP proliferation. This study presents *Rab23* as a novel regulator of GCP  
325 proliferation, remarkably, acting both positively and negatively via the Shh signaling  
326 pathway. Excitingly, our data showed for the first time that *Rab23* has a role in primary  
327 cilium-dependent Shh signal transduction during cerebellar development. This  
328 demonstration is made possible as the brain-specific KO of *Rab23* in our genetic model  
329 did not result in mid-gestation lethality in mice as compared to a global loss of *Rab23*  
330 in the *open brain* mutant.

331

332 Previous examination of primary cilia in the node of 2 to 6 somite stage *Rab23*-null  
333 embryo reported largely unaltered morphology and similar overall percentage of  
334 ciliation as compared to the control (39). Interestingly, unlike the node cilia, our data  
335 revealed defective ciliation in the *Rab23*-null GCP during embryonic and early  
336 postnatal cerebellar development. siRNA-mediated knockdown studies performed on  
337 different cell lines have reported inconsistent conclusions with regards to the role of  
338 *Rab23* in ciliogenesis (40,41,56,60). These discrepancies suggest that the functions of  
339 *Rab23* in primary cilia could vary in a context or cell-type specific manner. Our data  
340 supported a GCP-specific role of *Rab23* in ciliogenesis *in vivo*. In line with the *in vivo*  
341 data, primary culture of *Rab23*-KO GCPs also showed deficiencies in ciliation and  
342 compromised response to Shh ligand and SAG-mediated Smo activation, implicating a  
343 disrupted primary cilium-dependent Shh signaling.

344

345 Mutations of Shh pathway repressor genes, including *Ptch1*, *Gpr161* and *Sufu*,  
346 commonly lead to the development of medulloblastoma(9,10,61,62) via *Gli1*  
347 upregulation (63). We showed that loss of *Rab23*, unlike other Shh repressors, did not  
348 promote the development of medulloblastoma despite the basal level up-regulation of



349 *Gli1* expression in the GCPs. We further showed that the overall amount of Shh ligands  
350 in *Rab23*-deleted cerebellar tissues remained relatively similar to that of control at both  
351 embryonic and postnatal stages, suggesting a sufficient source of Shh stimulants in the  
352 KO cerebellar tissue environment. Given the above, we deduce that one possible  
353 explanation for an absence of tumorigenicity is the defective primary cilium in *Rab23*-  
354 KO GCPs. The compromised response to primary cilium-dependent Shh activation may  
355 lead to insufficient paracrine pathway stimulations to drive tumor formation in the  
356 *Rab23*-KO cerebellum. This is in line with the indispensable role of primary cilium for  
357 medulloblastoma formation (18,64).

358

359 Harboring the primary cilium defect in GCP, *Rab23*-KO cerebellum partially  
360 phenocopied other ciliopathy mutants, which often exhibit severe cerebellar size  
361 shrinkage, abnormal foliation and reduced GCP proliferation due to impaired Shh  
362 signaling (16–18,64). In this regard, the postnatal Nes-CKO displayed profoundly mis-  
363 patterned folia, and smaller cerebellum at later adult stage, similar to other ciliopathy  
364 mutants. Nevertheless, in contrast to most ciliopathy mutants, Shh signaling in the  
365 *Rab23*-KO mutant was not completely inhibited. Instead, there was a ligand-  
366 independent upregulation of Shh pathway at basal level, which underlies the increase  
367 in GCP proliferation and transiently enlarged cerebellum at earlier postnatal stages.  
368 *Rab23* was known to influence *Gli2* and *Gli3* expression at the transcript level (65) and  
369 it could also antagonize *Gli1*'s nuclear translocation and transcriptional activation in  
370 cytosolic compartment in the absence of ligand stimulation (36). Given the ligand-  
371 independent function of *Rab23* in Shh pathway, it is therefore plausible that the Shh  
372 pathway in GCP became over-activated due to a basal increase in *Gli* activations in the  
373 absence of *Rab23* function. However, limited by the incompetency to respond to Smo

374 activation from cell/cilium membrane (Fig 6F-G), Rab23-deficient GCP could not  
375 reach or sustain the full capacity of ectopic Shh pathway activation, causing them less  
376 susceptible to tumor formation as compared to other repressors such as *Ptch1* and *Sufu*  
377 mutants that are not known to exhibit primary cilium defect.

378

379 Previous work has demonstrated that Rab23 maintains the overexpressed-Smo protein  
380 turnover in the primary cilium of MDCK cells upon Shh stimulation (66), however, the  
381 underlying mechanism, and how this regulation would affect Shh signaling output  
382 remain elusive. Our data show that Rab23-depleted GCPs were less responsive to a  
383 Smo agonist (SAG). As SAG activates Shh signaling pathway by facilitating Smo  
384 translocation to the cilium axoneme, the compromised response observed in mutant  
385 cells could possibly be caused by the lack of intact and functional primary cilium for Smo-  
386 mediated signaling transduction, and/or impaired maintenance of Smo turnover in the  
387 primary cilium of *Rab23*-KO GCP. Our data suggest that the cilium malformation could  
388 be the underlying reason. However, the relatively short cilia in GCP cells was  
389 technically difficult for detection or quantification of the cilium localization of Smo in  
390 primary GCP. We are therefore not able to ascertain if the ciliary turnover/trafficking  
391 of Smo protein is affected in the mutant GCP. Nevertheless, given its previous  
392 implicated role on Smo protein turnover in MDCK cells (66), Rab23 could potentially  
393 mediate the Smo recycling in primary cilium to influence Shh pathway.

394

395 Taken together, our findings suggest that Rab23 confers dual functions in regulating  
396 Shh signaling and GCP proliferation; it potentiates primary cilium and Shh/Smo-  
397 dependent signaling cascade, while antagonizing basal level Gli transcriptional  
398 activation. Our data thus present a previously unappreciated aspect of Rab23 in

399 mediating Shh signaling upstream of Smo. This study sheds new light into the genetic  
400 and mechanistic insights underpinning Shh signaling-mediated GCP proliferation and  
401 cerebellar development.

402

## 403 **Materials and Methods**

404

405 *Animals.* *Rab23-floxed* animal was generated by Ozgene Pty Ltd. Conditional *Rab23-*  
406 *floxed* allele was designed by flanking exon 4 for *Rab23* gene with loxP sites. Nestin-  
407 Cre (Jackson Lab cat. no. 003771) was a kind gift from Shawn Je H.S. from Duke-Nus  
408 Medical School. All animals were housed in Specific Pathogen Free (SPF) animal  
409 facility at Duke-NUS Medical School, Singapore. All animal related procedures were  
410 carried out in compliance to animal handling guidelines and protocol approved by  
411 IACUC Singhealth, Singapore.

412

413 *Expression vectors.* For *in vitro* viral transduction assay, Rab23 over-expression or  
414 cDNA were cloned into lentiviral pFUGW backbone. Wild-type (WT) Rab23  
415 overexpression construct, previously described full-length Rab23 sequence (67) was  
416 sub-cloned into pFUGW vector driven by Ubc promoter. All plasmids were amplified  
417 according to the recommended protocol using Endofree® plasmid purification kit  
418 (Qiagen, Germany).

419 *Viral transduction and culturing of mouse primary GCP.* For viral transduction of  
420 primary GCP, self-inactivating murine lentiviruses were prepared according to  
421 previously described protocol (42). GCP culture method was modified from standard  
422 protocol. Briefly, P7 cerebellar tissues dissected were cut into small pieces and digested  
423 in digestion buffer (EBSS / Papain, 1000 times dilution factor (Worthington

424 Biochemical Corporation cat#:3126) / 0.1 mg/ml DNaseI (Roche cat#:11284932001) /  
425 5.5 mM cysteine-HCL) for 15 mins at 37 °C prior to dissociation into single cells.  
426 Digestion was terminated by resuspension in 10 % FBS/culture medium. Suspension  
427 culture was passed through 70 µm cell strainer (Corning cat#352350) to remove  
428 undigested tissue clumps. Dissociated single-cell GCPs were plated on poly-D-lysine  
429 (Sigma Aldrich cat#: P6407) coated culture plates at the desired cell densities in  
430 Neurobasal (Gibco®, Life Technologies, USA) medium containing B27 supplement,  
431 200uM GlutaMAX™-I (Gibco®, Life Technologies, USA), sodium pyruvate (1 mM),  
432 penicilin/streptomycin and KCl (250 µM). Half of the culture medium was refreshed  
433 every other day. Viral transduction was performed 2 to 3 hours after culture while  
434 replacing fresh culture medium. The efficiencies of overexpression were validated by  
435 real-time QPCR assay of DIV7 culture. For SAG stimulation, 0.2 µM of SAG (Cayman  
436 Chemical, cat#: 11914-1) was added to the DIV 1 culture 24 hours prior to total RNA  
437 extraction. Equal volume of DMSO was added as the untreated negative control group.  
438 For Shh stimulation, 2 µg/ml of Shh (Stem Cell Technologies, cat#: 78065) was added  
439 to the DIV 1 culture 24 hours prior to total RNA extraction.

440

441 ***EdU-pulse labelling assays.*** EdU labeling assay was carried out according to the  
442 manufacturer's protocol. Click-iT ® EdU Alexa Fluor™ 647 Imaging Kit  
443 (ThermoFisher Scientific, cat #: C10340). For GCP culture labeling, 10 µM Edu was  
444 added to the culture and incubated for 3 hours before fixation. For E15.5 embryos  
445 labelling, 0.25 mg EdU was injected intraperitoneally into the pregnant mice 2 hours  
446 before fixing the embryo. For postnatal animals, 25ug EdU was injected  
447 subcutaneously 2 hours prior to brain fixation.

448

449 ***Cryosectioning, immunohistochemistry and imaging.*** Mice were perfused with saline  
450 followed by fixative in 4 % paraformaldehyde (Sigma Aldrich cat#:P6148) /  
451 HistoChoice (Amresco, cat#: H120) mixture of 1:1 ratio, and whole brains extracted  
452 were post-fix at 4 °C for 2 hours, saturated in 30 % sucrose in 0.12 M phosphate buffer  
453 and subjected to cryosection at 20 µm thickness. All cerebellar tissues were sectioned  
454 at sagittal angle and mounted on pre-coated glass slides (Superfrost® Plus,  
455 Fisherbrand®). Mid-sagittal sections were selected for immunostaining. Antibodies and  
456 the dilution factor used were: Pax6 (Covance, 1:1000), Nestin (Sigma, 1:800), NeuN  
457 (Milipore, 1:800), GFAP (Milipore, 1:1000), Arl13b (Proteintech, 1:1000). For histo-  
458 immunostaining, tissue sections were incubated at 100 °C for 10 mins in pH 6 10 mM  
459 sodium citrate buffer with 0.05 % Tween-20 for antigen retrieval, washed twice with  
460 phosphate buffer saline (PBS), blocked 1 hour in 1 % BSA/2 % horse serum/0.3 % Tx-  
461 100 and incubated 4°C overnight with primary antibodies diluted in blocking buffer.  
462 After 3 times of 5 minutes washes with PBS, tissue sections were incubated with  
463 secondary antibodies (Alexa Fluor®, Life Technologies, USA) for 1 hour (hr) at room  
464 temperature. Tissue sections were mounted in mounting media after 3 times PBS  
465 washes. Fluorescence images were taken using Zeiss LSM710 confocal system.

466

467 ***Real-time quantitative PCR.*** Total RNA was extracted using Qiagen's RNeasy Mini  
468 Kit. Equal amount of total RNAs from each sample were subjected to reverse  
469 transcription to produce cDNA. Equal volume of cDNA was used to perform  
470 quantitative PCR assay using SYBR® Select Master Mix (Applied Biosystems™  
471 #4472908). Standard QPCR protocol was carried out according to manufacturer's  
472 instruction manual. Primers used were: mouse GAPDH: F-5'-  
473 TTCACCACCATGGAGAAGGC-3', R-5'- GGCATGGACTGTGGTCATGA-3';

474 mouse *Rab23*: F-5'-AGGCCTACTATCGAGGAGCC-3', R-5'-  
475 TTAGCCTTTTGGCCAGTCCC-3'; mouse *Gli1*: F-5'-  
476 CCCATAGGGTCTCGGGGTCTCAAAC-3', R-5'-  
477 GGAGGACCTGCGGCTGACTGTGTA  
478 A-3'; mouse *Gli2*: F-5'-CATGGTATCCCTAGCTCCTC-3', R-5'-  
479 GATGGCATCAAAGTCAATCT-3'; mouse *Gli3*: F-5'-  
480 CATGAACAGCCCTTTAAGAC-3', R-5'-TGATATGTGAGGTAGCACCA-3';  
481 mouse *Ptch1*: F-5'-TGCTGTGCCTGTGGTCATCCTGATT-3', R-5'-  
482 CAGAGCGAGCATAGCCCTGTGGTTC-3'; mouse *Atoh1*: F-5'-  
483 AGTCAATGAAGTTGTTTCCC-3', R-5'-ACAGATACTCTTATCTGCCC-3';  
484 mouse *Ki67*: F-5'-CATTGACCGCTCCTTTAGGTATGAAG-3', R-5'-  
485 TTGGTATCTTGACCTTCCCCATCAG-3'.

486

## 487 **Acknowledgement**

488 We sincerely thank C.C. Hui and B.L Tang for sharing critical and constructive  
489 comments and suggestions for the successful completion of this project. This study was  
490 supported by the National Medical Research Council – Young Individual Research  
491 Grant (NMRC/OFYIRG/0079/2018), HKBU Tier 1 and Tier 2 Start-up Grant (RG-  
492 SGT2/18-19/SCI/009) to C.H.H; the National Medical Research Council –  
493 Collaborative Research Grant (NMRC/CBRG/0094/2015) and Ministry of Education  
494 (MOE) Tier 2 grant (MOE2015-T2-1-022) and Tier 3 grant (MOE2017-T3-1-002) to  
495 E.L.G.

496

497

## 498 **Figure legends**

499

500 **Figure 1. Nestin-Cre-driven knock-out of *Rab23* causes expanded cerebellar size**  
501 **and abnormal foliation.**

502 A) Representative whole mount images of control and Nes-CKO mutant brains  
503 showing gross morphology of mouse cerebellum at P1, P4 and P15.

504 B) P4 cerebellar sizes as determined by measuring 2D surface area of cerebellum on  
505 images captured at similar angle. Control, n = 6; CKO, n = 4 Statistical significance,  
506 unpaired student t-test. P value \*\*  $\leq 0.01$ . Error bars depict  $\pm$ SE

507 C-D) Representative images showing H&E staining of control and Nes-CKO cerebellar  
508 sagittal sections of P1 (C) and P4 (D) animals. Red arrows highlight morphological  
509 changes in the external granule layer of Nes-CKO compared to the control.

510 E) Representative image showing whole brain of 2 months adult mice. Yellow asterisk  
511 shows smaller cerebellum of Nes-CKO mutant compared to the control.

512 F) Representative images showing H&E staining of sagittal cerebellar sections of 10  
513 months adult mice.

514

515 **Figure 2. KO of *Rab23* perturbs radial glial scaffold formation and causes partial**  
516 **loss of cerebellar laminar structure**

517 A-B) Representative images showing immunostaining of Nestin (red) on P1 (A) and P4  
518 (B) sagittal cerebellar tissue sections to illustrate radial glial scaffold.

519 C) Representative images showing immunostaining of GFAP (red) on P15 sagittal  
520 cerebellar tissue sections to illustrate radial glial scaffold.

521 D) Representative images showing co-immunostaining of NeuN and GFAP on ten  
522 months adult cerebellum to illustrate cerebellar cytoarchitecture, laminar layers and  
523 glial cells.

524 D'-D'') Close up images showing NeuN-positive granule neurons and GFAP-positive  
525 glial cells at the internal granule layer and pial surface.

526

527 **Figure 3. Depletion of Rab23 leads to GCP migration defect**

528 A) Representative images showing immunostaining of Pax6 on E15.5 sagittal sections  
529 of cerebellar primordium to illustrate the GCPs residing in the EGL and early inward  
530 migrating GCPs. White arrows show inward migration paths. EGL, external granular  
531 layer; RL, rhombic lip

532 B) Quantification of the proportion of innervated Pax6+ GCPs against all Pax6-labelled  
533 GCPs. 2 to 3 sections (~50-100  $\mu$ m apart) of the cerebellar primordium were counted  
534 for each animal. Control, n = 3; CKO, n = 3. Statistical significance, unpaired student  
535 t-test. P value \*  $\leq$  0.05. Error bars depict  $\pm$ SE

536 C) Representative image and graph showing two-hours EdU labelled progenitors in the  
537 cerebellar primordium. Magenta arrows show migration paths of progenitors from  
538 EGL, yellow arrows show migration paths of progenitors from VL. Control, n = 3;  
539 CKO, n = 3. 2 to 3 sections (~50-100  $\mu$ m apart) were counted for each animal. Statistical  
540 significance, unpaired student t-test. P value \*\*\*  $\leq$  0.001. Error bars depict  $\pm$ SE

541 D) Representative images showing cerebellar lobules of 48 hours Edu-labelled cells  
542 from P5-P7 to illustrate proportions of cells innervated the IGL after 48 hours of pulse-  
543 chase labeling. EGL, external granular layer; ML, molecular layer; ICL, internal  
544 granule layer.

545 E) Quantification of the proportion of Edu-labelled cells in each laminar layer as  
546 indicated. Control, n = 3; CKO, n = 3. Statistical significance, two-way ANOVA,  
547 Bonferroni posttests. P value \*\*\*  $\leq$  0.001, \*\* $\leq$  0.01, \* $\leq$  0.05. Error bars depict  $\pm$ SE

548



549 **Figure 4. *Rab23*-deficient cerebellum exhibited thickened EGL and elevated GCP**  
550 **proliferation**

551 A-B) Representative images showing co-immunostaining of Pax6 (green) and  
552 Calbindin (red) on P1 sagittal sections of cerebellum to illustrate the GCPs and Purkinje  
553 cells layers. Asterisks show a thickened EGL layer in Nes-CKO cerebellum compared  
554 to the control.

555 C-D) Representative images showing two-hours EdU labelled dividing progenitors in  
556 the E15.5 (C) and P4 (D) cerebellum. Double headed arrows highlight expanded pools  
557 of dividing cells in the Nes-CKO EGL as compared to the control counterparts.

558 E) Quantification of the percentages of 2 hours Edu-labelled proliferative cells in the  
559 EGL at E15.5. 2 sections (~100  $\mu\text{m}$  apart) of the cerebellar primordium were counted  
560 for each animal. Control, n = 3; CKO n = 3. Statistical significance, unpaired student t-  
561 test. P value \*\*\*  $\leq 0.001$ . Error bars depict  $\pm\text{SE}$

562 F) Graphs illustrating the fold change of the gene expression levels of E15.5 cerebellar  
563 tissues quantified by real-time quantitative PCR. Control, n = 4; CKO n = 4. Nes-CKO  
564 values were normalized to its respective control group. Statistical significance, unpaired  
565 student t-test. P value \*\*\*  $\leq 0.001$ . Error bars depict  $\pm\text{SE}$

566

567 **Figure 5. *Shh* activity is differentially perturbed in the embryonic and postnatal**  
568 **cerebellar tissues.**

569 A) Graphs illustrating the fold change of the gene expression levels of E15.5 cerebellar  
570 tissues quantified by real-time quantitative PCR. Control, n = 4; CKO n = 4. Nes-CKO  
571 values were normalized to its respective control group. Statistical significance, unpaired  
572 student t-test. P value \*\*  $\leq 0.01$ . Error bars depict  $\pm\text{SE}$ . n.s., not significant.

573 B) Graphs illustrating the fold change of the gene expression levels of P15 cerebellar  
574 tissues quantified by real-time quantitative PCR. Nes-CKO values were normalized to  
575 its respective control group. Control, n = 3; CKO n = 4. Statistical significance,  
576 unpaired student t-test. P value \*\*\*  $\leq 0.001$ . Error bars depict  $\pm$ SE. n.s., not significant.  
577 C) Graphs illustrating the basal level *Gli1* expression profiles of E15.5 and P15  
578 cerebellar tissues quantified by real-time quantitative PCR. E15.5 Control, n = 4; CKO  
579 n = 4; P15 Control, n = 3; CKO n = 4. Statistical significance, one-way ANOVA,  
580 Bonferroni's Multiple Comparison Test. P value \*\*\*  $\leq 0.0001$ . Error bars depict  $\pm$ SE.  
581 n.s., not significant.

582

583 **Figure 6. *Rab23* regulates ciliogenesis and Shh signaling in the GCPs.**

584 A) Graphs showing gene expression levels of P7 GCPs primary cultures harvested at  
585 DIV 7. Lentiviral carrying the over-expression constructs as indicated were transduced  
586 into the primary cultures at Day 0, 2 to 3 hours after seeding cells. Quantifications  
587 depict 4 independent experiments. Statistical significance, one-way ANOVA,  
588 Bonferroni's Multiple Comparison Test. P value \*\*\*  $\leq 0.0001$ ; \*\* $\leq 0.01$ , \* $\leq 0.05$ . Error  
589 bars depict  $\pm$ SE.

590 B-C) Representative images (B) and graph (C) showing three-hours EdU labelled  
591 (magenta; blue: DAPI) dividing progenitors in P7 GCPs primary cultures of each  
592 indicated groups fixed at DIV 7. Cell proliferation was determined by the percentages  
593 of Edu-labelled cells out of total number of DAP-positive nuclei in each image taken.  
594 For quantification of each batch, 3 fluorescence images were randomly taken from each  
595 respective group as indicated. Quantifications depict 3 independent experiments.  
596 Statistical significance, one-way ANOVA, Bonferroni's Multiple Comparison Test. P  
597 value \*\*\*  $\leq 0.0001$ ; \*\* $\leq 0.01$ . Error bars depict  $\pm$ SE.

598 D) Quantification of the percentages of ciliation in P7 GCPs primary cultures at DIV7  
599 determined by counting the number of cells bearing Arl13B-labelled primary cilium  
600 against all DAPI-positive nuclei in each image taken. For quantification of each batch,  
601 3 fluorescence images were randomly taken from each respective group as indicated.  
602 Quantifications depict 3 independent experiments. Statistical significance, one-way  
603 ANOVA, Bonferroni's Multiple Comparison Test. P value \*\*\*  $\leq 0.0001$ ; \*\* $\leq 0.01$ .  
604 Error bars depict  $\pm$ SE.

605 E) Representative images showing immunostaining of Arl13B on E15.5 (top) and P15  
606 (bottom) sagittal sections to illustrate the primary cilia of GCPs residing in the EGL.  
607 EGL, external granular layer; ML, molecular layer.

608 F-G) Graphs showing gene expression levels of P7 GCPs primary cultures treated with  
609 Shh (F) and SAG (G) on DIV 1 respectively. Total RNAs were extracted from DIV 2  
610 culture, 24 hours after the respective treatments. Quantifications depict double delta Ct  
611 values of 3 independent experiments. Delta Ct values of the treated groups were  
612 normalized to its respective untreated group, which gave double delta Ct values as  
613 plotted. Statistical significance, unpaired student t-test. P value \*\*\*  $\leq 0.0001$ ; \*\* $\leq 0.01$ .  
614 Error bars depict  $\pm$ SE.

## 615 **References**

- 616 1. Wallace VA. Purkinje-cell-derived Sonic hedgehog regulates granule neuron  
617 precursor cell proliferation in the developing mouse cerebellum [Internet]. Vol.  
618 9, *Current Biology*. Elsevier; 1999. p. 445–8. Available from:  
619 [http://www.cell.com/current-biology/abstract/S0960-9822\(99\)80195-X](http://www.cell.com/current-biology/abstract/S0960-9822(99)80195-X)
- 620 2. Wechsler-Reya RJ, Scott MP. Control of neuronal precursor proliferation in the  
621 cerebellum by sonic hedgehog. *Neuron*. 1999;22(1):103–14.
- 622 3. Gao W-Q, Heintz N, Hatten ME. Cerebellar granule cell neurogenesis is  
623 regulated by cell-cell interactions in vitro. *Neuron* [Internet]. 1991  
624 May;6(5):705–15. Available from:  
625 <http://linkinghub.elsevier.com/retrieve/pii/089662739190168Y>
- 626 4. Basson MA, Wingate RJ. Congenital hypoplasia of the cerebellum:  
627 developmental causes and behavioral consequences. *Front Neuroanat*  
628 [Internet]. 2013 Sep 3 [cited 2018 Nov 23];7:29. Available from:  
629 <http://www.ncbi.nlm.nih.gov/pubmed/24027500>
- 630 5. Roussel MF, Hatten ME. Cerebellum development and medulloblastoma. *Curr*  
631 *Top Dev Biol* [Internet]. 2011;94:235–82. Available from:  
632 <http://linkinghub.elsevier.com/retrieve/pii/B9780123809162000085>
- 633 6. Dahmane N, Ruiz i Altaba A. Sonic hedgehog regulates the growth and  
634 patterning of the cerebellum. *Development* [Internet]. 1999 Jun;126(14):3089–  
635 100. Available from: <http://www.ncbi.nlm.nih.gov/pubmed/10375501>
- 636 7. Lewis PM, Gritli-Linde A, Smeyne R, Kottmann A, McMahon AP. Sonic  
637 hedgehog signaling is required for expansion of granule neuron precursors and  
638 patterning of the mouse cerebellum. *Dev Biol* [Internet]. 2004 Jun;270(2):393–  
639 410. Available from:  
640 <http://linkinghub.elsevier.com/retrieve/pii/S0012160604001939>
- 641 8. Dey J, Ditzler S, Knoblauch SE, Hatton BA, Schelter JM, Cleary MA, et al. A  
642 Distinct Smoothed Mutation Causes Severe Cerebellar Developmental  
643 Defects and Medulloblastoma in a Novel Transgenic Mouse Model. *Mol Cell*  
644 *Biol* [Internet]. 2012;32(20):4104–15. Available from:  
645 <http://mcb.asm.org/cgi/doi/10.1128/MCB.00862-12>
- 646 9. Dong J, Gailani MR, Pomeroy SL, Reardon D, Bale AE. Identification  
647 of PATCHED mutations in medulloblastomas by direct sequencing [Internet].  
648 Vol. 16, *Hum. Mutat*. 2000. p. 89–90. Available from:  
649 [http://doi.wiley.com/10.1002/1098-](http://doi.wiley.com/10.1002/1098-1004%28200007%2916%3A1%3C89%3A%3AAID-HUMU18%3E3.0.CO%3B2-7)  
650 [1004%28200007%2916%3A1%3C89%3A%3AAID-](http://doi.wiley.com/10.1002/1098-1004%28200007%2916%3A1%3C89%3A%3AAID-HUMU18%3E3.0.CO%3B2-7)  
651 [HUMU18%3E3.0.CO%3B2-7](http://doi.wiley.com/10.1002/1098-1004%28200007%2916%3A1%3C89%3A%3AAID-HUMU18%3E3.0.CO%3B2-7)
- 652 10. Taylor MD, Liu L, Raffel C, Hui C, Mainprize TG, Zhang X, et al. Mutations  
653 in SUFU predispose to medulloblastoma. *Nat Genet* [Internet]. 2002 Jul  
654 17;31(3):306–10. Available from: <http://www.nature.com/articles/ng916z>
- 655 11. Raffel C, Jenkins RB, Frederick L, Hebrink D, Alderete B, Fults DW, et al.  
656 Sporadic medulloblastomas contain PTCH mutations. *Cancer Res* [Internet].  
657 1997 Mar 1;57(5):842–5. Available from:  
658 <http://www.ncbi.nlm.nih.gov/pubmed/9041183>
- 659 12. Begemann M, Waszak SM, Robinson GW, Jäger N, Sharma T, Knopp C, et al.  
660 Germline GPR161 mutations predispose to pediatric medulloblastoma. *J Clin*  
661 *Oncol* [Internet]. 2020 Jan 1 [cited 2020 Mar 9];38(1):43–50. Available from:  
662 <http://ascopubs.org/doi/10.1200/JCO.19.00577>
- 663 13. Tukachinsky H, Lopez L V, Salic A. A mechanism for vertebrate Hedgehog  
664 signaling: recruitment to cilia and dissociation of SuFu-Gli protein complexes

- 665 [Internet]. Vol. 191, *The Journal of Cell Biology*. 2010. p. 415–28. Available  
666 from: <http://jcb-dataviewer.rupress.org/jcb/doi/10.1083/jcb.201004108>
- 667 14. Haycraft CJ, Banizs B, Aydin-Son Y, Zhang Q, Michaud EJ, Yoder BK. Gli2  
668 and Gli3 localize to cilia and require the intraflagellar transport protein polaris  
669 for processing and function. [Internet]. Vol. 1, *PLoS Genet*. 2005. p. e53.  
670 Available from:  
671 [http://eutils.ncbi.nlm.nih.gov/entrez/eutils/elink.fcgi?dbfrom=pubmed&id](http://eutils.ncbi.nlm.nih.gov/entrez/eutils/elink.fcgi?dbfrom=pubmed&id=16254602&retmode=ref&cmd=prlinks)  
672 [=16254602&retmode=ref&cmd=prlinks](http://eutils.ncbi.nlm.nih.gov/entrez/eutils/elink.fcgi?dbfrom=pubmed&id=16254602&retmode=ref&cmd=prlinks)
- 673 15. Wong SY, Seol AD, So P-L, Ermilov AN, Bichakjian CK, Epstein EH, et al.  
674 Primary cilia can both mediate and suppress Hedgehog pathway–dependent  
675 tumorigenesis. *Nat Med* [Internet]. 2009 Sep 23;15(9):1055–61. Available  
676 from: <http://www.nature.com/articles/nm.2011>
- 677 16. Spassky N, Han Y-G, Aguilar A, Strehl L, Besse L, Laclef C, et al. Primary  
678 cilia are required for cerebellar development and Shh-dependent expansion of  
679 progenitor pool. *Dev Biol* [Internet]. 2008 May;317(1):246–59. Available  
680 from: <http://linkinghub.elsevier.com/retrieve/pii/S0012160608001395>
- 681 17. Chizhikov V V., Davenport J, Zhang Q, Shih EK, Cabello OA, Fuchs JL, et al.  
682 Cilia proteins control cerebellar morphogenesis by promoting expansion of the  
683 granule progenitor pool. *J Neurosci* [Internet]. 2007 Sep 5;27(36):9780–9.  
684 Available from: <http://www.ncbi.nlm.nih.gov/pubmed/17804638>
- 685 18. Han YG, Kim HJ, Dlugosz AA, Ellison DW, Gilbertson RJ, Alvarez-Buylla A.  
686 Dual and opposing roles of primary cilia in medulloblastoma development. *Nat*  
687 *Med* [Internet]. 2009;15(9):1062–5. Available from:  
688 <http://dx.doi.org/10.1038/nm.2020>
- 689 19. Bay SN, Long AB, Caspary T. Disruption of the ciliary GTPase Arl13b  
690 suppresses Sonic hedgehog overactivation and inhibits medulloblastoma  
691 formation. *Proc Natl Acad Sci* [Internet]. 2018 Feb 13 [cited 2019 Jan  
692 5];115(7):1570–5. Available from:  
693 [www.pnas.org/cgi/doi/10.1073/pnas.1706977115](http://www.pnas.org/cgi/doi/10.1073/pnas.1706977115)
- 694 20. Gajjar A, Stewart CF, Ellison DW, Kaste S, Kun LE, Packer RJ, et al. Phase I  
695 Study of Vismodegib in Children with Recurrent or Refractory  
696 Medulloblastoma: A Pediatric Brain Tumor Consortium Study. *Clin Cancer*  
697 *Res* [Internet]. 2013 Nov 15 [cited 2018 Nov 28];19(22):6305–12. Available  
698 from: <http://www.ncbi.nlm.nih.gov/pubmed/24077351>
- 699 21. Guo A, Wang T, Ee LN, Aulia S, Kooi HC, Teng FYH, et al. Open brain gene  
700 product Rab23: Expression pattern in the adult mouse brain and functional  
701 characterization. *J Neurosci Res*. 2006;
- 702 22. Alessandri J-L, Dagoneau N, Laville J-M, Baruteau J, Hébert J-C, Cormier-  
703 Daire V. RAB23 mutation in a large family from Comoros Islands with  
704 Carpenter syndrome. [Internet]. Vol. 152A, *Am. J. Med. Genet*. 2010. p. 982–  
705 6. Available from:  
706 [http://eutils.ncbi.nlm.nih.gov/entrez/eutils/elink.fcgi?dbfrom=pubmed&id](http://eutils.ncbi.nlm.nih.gov/entrez/eutils/elink.fcgi?dbfrom=pubmed&id=20358613&retmode=ref&cmd=prlinks)  
707 [=20358613&retmode=ref&cmd=prlinks](http://eutils.ncbi.nlm.nih.gov/entrez/eutils/elink.fcgi?dbfrom=pubmed&id=20358613&retmode=ref&cmd=prlinks)
- 708 23. Jenkins D, Seelow D, Jehee FS, Perlyn CA, Alonso LG, Bueno DF, et al.  
709 RAB23 mutations in Carpenter syndrome imply an unexpected role for  
710 hedgehog signaling in cranial-suture development and obesity. [Internet]. Vol.  
711 80, *Am. J. Hum. Genet*. 2007. p. 1162–70. Available from:  
712 [http://eutils.ncbi.nlm.nih.gov/entrez/eutils/elink.fcgi?dbfrom=pubmed&id](http://eutils.ncbi.nlm.nih.gov/entrez/eutils/elink.fcgi?dbfrom=pubmed&id=17503333&retmode=ref&cmd=prlinks)  
713 [=17503333&retmode=ref&cmd=prlinks](http://eutils.ncbi.nlm.nih.gov/entrez/eutils/elink.fcgi?dbfrom=pubmed&id=17503333&retmode=ref&cmd=prlinks)
- 714 24. Haye D, Collet C, Sembely-Taveau C, Haddad G, Denis C, Soulé N, et al.

- 715 Prenatal findings in carpenter syndrome and a novel mutation in RAB23.  
716 [Internet]. Vol. 164A, *Am. J. Med. Genet.* 2014. p. 2926–30. Available from:  
717 [http://eutils.ncbi.nlm.nih.gov/entrez/eutils/elink.fcgi?dbfrom=pubmed&id](http://eutils.ncbi.nlm.nih.gov/entrez/eutils/elink.fcgi?dbfrom=pubmed&id=25168863&retmode=ref&cmd=prlinks)  
718 [=25168863&retmode=ref&cmd=prlinks](http://eutils.ncbi.nlm.nih.gov/entrez/eutils/elink.fcgi?dbfrom=pubmed&id=25168863&retmode=ref&cmd=prlinks)
- 719 25. Tarhan E, Oğuz H, Şafak MA, Samim E. The Carpenter syndrome phenotype.  
720 *Int J Pediatr Otorhinolaryngol.* 2004;68(3):353–7.
- 721 26. Balci S, Onol B, Eryilmaz M, Haytöglu T. A case of Carpenter syndrome  
722 diagnosed in a 20-week-old fetus with postmortem examination. *Clin Genet.*  
723 1997;51(6):412–6.
- 724 27. Bersani G, Maddalena F, Pasquini M, Orlandi V, Pancheri P. Association of  
725 schizophrenia and Carpenter syndrome. *Acta Neuropsychiatr* [Internet]. 2003  
726 Oct 24;15(05):304–5. Available from:  
727 [https://www.cambridge.org/core/product/identifier/S0924270800004373/type/j](https://www.cambridge.org/core/product/identifier/S0924270800004373/type/journal_article)  
728 [ournal\\_article](https://www.cambridge.org/core/product/identifier/S0924270800004373/type/journal_article)
- 729 28. Ivaniutsin U, Chen Y, Mason JO, Price DJ, Pratt T. Adenomatous polyposis  
730 coli is required for early events in the normal growth and differentiation of the  
731 developing cerebral cortex. [Internet]. Vol. 4, *Neural Dev.* 2009. p. 3.  
732 Available from:  
733 [http://eutils.ncbi.nlm.nih.gov/entrez/eutils/elink.fcgi?dbfrom=pubmed&id](http://eutils.ncbi.nlm.nih.gov/entrez/eutils/elink.fcgi?dbfrom=pubmed&id=19149881&retmode=ref&cmd=prlinks)  
734 [=19149881&retmode=ref&cmd=prlinks](http://eutils.ncbi.nlm.nih.gov/entrez/eutils/elink.fcgi?dbfrom=pubmed&id=19149881&retmode=ref&cmd=prlinks)
- 735 29. Taravath S, Tonsgard JH. Cerebral malformations in Carpenter syndrome.  
736 *Pediatr Neurol* [Internet]. 1993 May 1 [cited 2018 Nov 28];9(3):230–4.  
737 Available from: <http://www.ncbi.nlm.nih.gov/pubmed/8352858>
- 738 30. Eggenschwiler JT, Espinoza E, Anderson K V. Rab23 is an essential negative  
739 regulator of the mouse Sonic hedgehog signalling pathway. [Internet]. Vol.  
740 412, *Nature.* 2001. p. 194–8. Available from:  
741 [http://eutils.ncbi.nlm.nih.gov/entrez/eutils/elink.fcgi?dbfrom=pubmed&id](http://eutils.ncbi.nlm.nih.gov/entrez/eutils/elink.fcgi?dbfrom=pubmed&id=11449277&retmode=ref&cmd=prlinks)  
742 [=11449277&retmode=ref&cmd=prlinks](http://eutils.ncbi.nlm.nih.gov/entrez/eutils/elink.fcgi?dbfrom=pubmed&id=11449277&retmode=ref&cmd=prlinks)
- 743 31. Eggenschwiler JT, Bulgakov O V, Qin J, Li T, Anderson K V. Mouse Rab23  
744 regulates Hedgehog signaling from Smoothed to Gli proteins [Internet]. Vol.  
745 290, *Developmental Biology.* 2006. p. 1–12. Available from:  
746 <http://linkinghub.elsevier.com/retrieve/pii/S0012160605006299>
- 747 32. Svärd J, Heby-Henricson K, Henricson KH, Persson-Lek M, Rozell B, Lauth  
748 M, et al. Genetic elimination of Suppressor of fused reveals an essential  
749 repressor function in the mammalian Hedgehog signaling pathway. [Internet].  
750 Vol. 10, *Developmental Cell.* 2006. p. 187–97. Available from:  
751 [http://www.ncbi.nlm.nih.gov/sites/entrez?Db=pubmed&Cmd=ShowDetail](http://www.ncbi.nlm.nih.gov/sites/entrez?Db=pubmed&Cmd=ShowDetailView&TermToSearch=16459298&ordinalpos=3&itool=EntrezSystem2.PEntrez.Pubmed.Pubmed_ResultsPanel.Pubmed_RVDocSum)  
752 [View&TermToSearch=16459298&ordinalpos=3&itool=EntrezS](http://www.ncbi.nlm.nih.gov/sites/entrez?Db=pubmed&Cmd=ShowDetailView&TermToSearch=16459298&ordinalpos=3&itool=EntrezSystem2.PEntrez.Pubmed.Pubmed_ResultsPanel.Pubmed_RVDocSum)  
753 [ystem2.PEntrez.Pubmed.Pubmed\\_ResultsPanel.Pubmed\\_RVDocSum](http://www.ncbi.nlm.nih.gov/sites/entrez?Db=pubmed&Cmd=ShowDetailView&TermToSearch=16459298&ordinalpos=3&itool=EntrezSystem2.PEntrez.Pubmed.Pubmed_ResultsPanel.Pubmed_RVDocSum)
- 754 33. Cooper AF. Cardiac and CNS defects in a mouse with targeted disruption of  
755 suppressor of fused [Internet]. Vol. 132, *Development.* 2005. p. 4407–17.  
756 Available from: <http://dev.biologists.org/cgi/doi/10.1242/dev.02021>
- 757 34. Jeong J. Growth and pattern of the mammalian neural tube are governed by  
758 partially overlapping feedback activities of the hedgehog antagonists patched 1  
759 and Hhip1. *Development* [Internet]. 2004 Dec 2;132(1):143–54. Available  
760 from: <http://dev.biologists.org/cgi/doi/10.1242/dev.01566>
- 761 35. Boehlke C, Bashkurov M, Buescher A, Krick T, John A-K, Nitschke R, et al.  
762 Differential role of Rab proteins in ciliary trafficking: Rab23 regulates  
763 smoothed levels. *J Cell Sci* [Internet]. 2010 May 1 [cited 2018 Nov  
764 22];123(Pt 9):1460–7. Available from:

- 765 <http://www.ncbi.nlm.nih.gov/pubmed/20375059>  
766 36. Chi S, Xie G, Liu H, Chen K, Zhang X, Li C, et al. Rab23 negatively regulates  
767 Gli1 transcriptional factor in a Su(Fu)-dependent manner. *Cell Signal*  
768 [Internet]. 2012 Jun;24(6):1222–8. Available from:  
769 <https://linkinghub.elsevier.com/retrieve/pii/S0898656812000599>  
770 37. Yoshimura S i, Egerer J, Fuchs E, Haas AK, Barr FA. Functional dissection of  
771 Rab GTPases involved in primary cilium formation [Internet]. Vol. 178, *The*  
772 *Journal of Cell Biology*. 2007. p. 363–9. Available from:  
773 <http://www.jcb.org/cgi/doi/10.1083/jcb.200703047>  
774 38. Gerondopoulos A, Strutt H, Stevenson NL, Sobajima T, Levine TP, Stephens  
775 DJ, et al. Planar Cell Polarity Effector Proteins Inturned and Fuzzy Form a  
776 Rab23 GEF Complex. *Curr Biol* [Internet]. 2019 Oct;29(19):3323–3330.e8.  
777 Available from:  
778 <https://linkinghub.elsevier.com/retrieve/pii/S0960982219310164>  
779 39. Fuller K, O’Connell JT, Gordon J, Mauti O, Eggenschwiler J. Rab23  
780 regulates Nodal signaling in vertebrate left-right patterning independently of  
781 the Hedgehog pathway. [Internet]. Vol. 391, *Developmental Biology*. 2014. p.  
782 182–95. Available from:  
783 [http://eutils.ncbi.nlm.nih.gov/entrez/eutils/elink.fcgi?dbfrom=pubmed&id](http://eutils.ncbi.nlm.nih.gov/entrez/eutils/elink.fcgi?dbfrom=pubmed&id=24780629&retmode=ref&cmd=prlinks)  
784 [=24780629&retmode=ref&cmd=prlinks](http://eutils.ncbi.nlm.nih.gov/entrez/eutils/elink.fcgi?dbfrom=pubmed&id=24780629&retmode=ref&cmd=prlinks)  
785 40. Lim YS, Tang BL. A role for Rab23 in the trafficking of Kif17 to the primary  
786 cilium. [Internet]. Vol. 128, *J. Cell. Sci*. 2015. p. 2996–3008. Available from:  
787 [http://eutils.ncbi.nlm.nih.gov/entrez/eutils/elink.fcgi?dbfrom=pubmed&id](http://eutils.ncbi.nlm.nih.gov/entrez/eutils/elink.fcgi?dbfrom=pubmed&id=26136363&retmode=ref&cmd=prlinks)  
788 [=26136363&retmode=ref&cmd=prlinks](http://eutils.ncbi.nlm.nih.gov/entrez/eutils/elink.fcgi?dbfrom=pubmed&id=26136363&retmode=ref&cmd=prlinks)  
789 41. Leaf A, Von Zastrow M. Dopamine receptors reveal an essential role of IFT-B,  
790 KIF17, and Rab23 in delivering specific receptors to primary cilia. [Internet].  
791 Vol. 4, *Elife*. 2015. Available from:  
792 [http://eutils.ncbi.nlm.nih.gov/entrez/eutils/elink.fcgi?dbfrom=pubmed&id](http://eutils.ncbi.nlm.nih.gov/entrez/eutils/elink.fcgi?dbfrom=pubmed&id=26182404&retmode=ref&cmd=prlinks)  
793 [=26182404&retmode=ref&cmd=prlinks](http://eutils.ncbi.nlm.nih.gov/entrez/eutils/elink.fcgi?dbfrom=pubmed&id=26182404&retmode=ref&cmd=prlinks)  
794 42. Hor CHH, Goh ELK. Rab23 Regulates Radial Migration of Projection Neurons  
795 via N-cadherin. *Cereb Cortex* [Internet]. 2018 Apr 1;28(4):1516–31. Available  
796 from: <https://academic.oup.com/cercor/article/28/4/1516/4840630>  
797 43. Xu H, Yang Y, Tang X, Zhao M, Liang F, Xu P, et al. Bergmann Glia Function  
798 in Granule Cell Migration During Cerebellum Development. *Mol Neurobiol*  
799 [Internet]. 2013 Apr 19 [cited 2018 Nov 16];47(2):833–44. Available from:  
800 [https://link-springer-](https://link-springer-com.libproxy1.nus.edu.sg/content/pdf/10.1007%2Fs12035-013-8405-y.pdf)  
801 [com.libproxy1.nus.edu.sg/content/pdf/10.1007%2Fs12035-013-8405-y.pdf](https://link-springer-com.libproxy1.nus.edu.sg/content/pdf/10.1007%2Fs12035-013-8405-y.pdf)  
802 44. Sidman RL, Rakic P. Neuronal migration, with special reference to developing  
803 human brain: a review. *Brain Res* [Internet]. 1973 Nov;62(1):1–35. Available  
804 from: <http://linkinghub.elsevier.com/retrieve/pii/0006899373906173>  
805 45. Yue Q. PTEN deletion in Bergmann glia leads to premature differentiation and  
806 affects laminar organization. *Development* [Internet]. 2005;132(14):3281–91.  
807 Available from: <http://dev.biologists.org/cgi/doi/10.1242/dev.01891>  
808 46. Chung S, Kim C, Jung Y, Lee N, Jeong Y. Early cerebellar granule cell  
809 migration in the mouse embryonic development. *Cell*. 2010;86–95.  
810 47. Kim JYH, Nelson AL, Algon SA, Graves O, Sturla LM, Goumnerova LC, et al.  
811 Medulloblastoma tumorigenesis diverges from cerebellar granule cell  
812 differentiation in patched heterozygous mice. *Dev Biol* [Internet]. 2003  
813 Nov;263(1):50–66. Available from:  
814 <http://linkinghub.elsevier.com/retrieve/pii/S0012160603004342>

- 815 48. Yoshioka K. Control of granule cell precursor proliferation in the developing  
816 cerebellum and in medulloblastoma. *Biomedical Reviews*. 2005.
- 817 49. Roussel MF, Hatten ME. Cerebellum development and medulloblastoma. *Curr*  
818 *Top Dev Biol* [Internet]. 2011;94:235–82. Available from:  
819 <http://www.ncbi.nlm.nih.gov/pubmed/21295689>
- 820 50. Evans TM, Simpson F, Parton RG, Wicking C. Characterization of Rab23, a  
821 Negative Regulator of Sonic Hedgehog Signaling. In: *Methods in enzymology*  
822 [Internet]. 2005. p. 759–77. Available from:  
823 <http://www.ncbi.nlm.nih.gov/pubmed/16473637>
- 824 51. Corrales JD. Spatial pattern of sonic hedgehog signaling through Gli genes  
825 during cerebellum development. *Development* [Internet]. 2004;131(22):5581–  
826 90. Available from: <http://dev.biologists.org/cgi/doi/10.1242/dev.01438>
- 827 52. Lewis PM, Gritli-Linde A, Smeyne R, Kottmann A, McMahon AP. Sonic  
828 hedgehog signaling is required for expansion of granule neuron precursors and  
829 patterning of the mouse cerebellum. [Internet]. Vol. 270, *Developmental*  
830 *Biology*. 2004. p. 393–410. Available from:  
831 [http://eutils.ncbi.nlm.nih.gov/entrez/eutils/elink.fcgi?dbfrom=pubmed&id](http://eutils.ncbi.nlm.nih.gov/entrez/eutils/elink.fcgi?dbfrom=pubmed&id=15183722&retmode=ref&cmd=prlinks)  
832 [=15183722&retmode=ref&cmd=prlinks](http://eutils.ncbi.nlm.nih.gov/entrez/eutils/elink.fcgi?dbfrom=pubmed&id=15183722&retmode=ref&cmd=prlinks)
- 833 53. Lee J, Platt KA, Censullo P, Ruiz i Altaba A. Gli1 is a target of Sonic  
834 hedgehog that induces ventral neural tube development. *Development*  
835 [Internet]. 1997 Jul;124(13):2537–52. Available from:  
836 <http://www.ncbi.nlm.nih.gov/pubmed/9216996>
- 837 54. Bai CB, Joyner AL. Gli1 can rescue the in vivo function of Gli2. *Development*  
838 [Internet]. 2001 Dec;128(24):5161–72. Available from:  
839 <http://www.ncbi.nlm.nih.gov/pubmed/11748151>
- 840 55. Bai CB, Stephen D, Joyner AL. All mouse ventral spinal cord patterning by  
841 hedgehog is Gli dependent and involves an activator function of Gli3. *Dev Cell*  
842 [Internet]. 2004 Jan;6(1):103–15. Available from:  
843 <http://linkinghub.elsevier.com/retrieve/pii/S1534580703003940>
- 844 56. Yoshimura S, Egerer J, Fuchs E, Haas AK, Barr FA. Functional dissection of  
845 Rab GTPases involved in primary cilium formation. *J Cell Biol* [Internet]. 2007  
846 Jul 30;178(3):363–9. Available from:  
847 <http://www.jcb.org/lookup/doi/10.1083/jcb.200703047>
- 848 57. Butts T, Green MJ, Wingate RJT. Development of the cerebellum: simple steps  
849 to make a “little brain.” *Development* [Internet]. 2014;141(21):4031–41.  
850 Available from: <http://dev.biologists.org/cgi/doi/10.1242/dev.106559>
- 851 58. Wallace VA. Purkinje-cell-derived Sonic hedgehog regulates granule neuron  
852 precursor cell proliferation in the developing mouse cerebellum. *Curr Biol*  
853 [Internet]. 1999 Apr 22;9(8):445–8. Available from:  
854 <http://linkinghub.elsevier.com/retrieve/pii/S096098229980195X>
- 855 59. Miyazawa K, Himi T, Garcia V, Yamagishi H, Sato S, Ishizaki Y. A role for  
856 p27/Kip1 in the control of cerebellar granule cell precursor proliferation. *J*  
857 *Neurosci*. 2000;20(15):5756–63.
- 858 60. Hor CHH, Tang BL, Goh ELK. Rab23 and developmental disorders. *Rev*  
859 *Neurosci* [Internet]. 2018 Nov 27;29(8):849–60. Available from:  
860 [http://www.degruyter.com/view/j/revneuro.2018.29.issue-8/revneuro-2017-](http://www.degruyter.com/view/j/revneuro.2018.29.issue-8/revneuro-2017-0110/revneuro-2017-0110.xml)  
861 [0110/revneuro-2017-0110.xml](http://www.degruyter.com/view/j/revneuro.2018.29.issue-8/revneuro-2017-0110/revneuro-2017-0110.xml)
- 862 61. Begemann M, Waszak SM, Robinson GW, Jäger N, Sharma T, Knopp C, et al.  
863 Germline GPR161 mutations predispose to pediatric medulloblastoma. *J Clin*  
864 *Oncol*. 2020 Jan;38(1):43–50.



- 865 62. Zurawel RH, Allen C, Wechsler-Reya R, Scott MP, Raffel C. Evidence that  
866 haploinsufficiency of Ptc leads to medulloblastoma in mice. *Genes,*  
867 *Chromosom Cancer.* 2000 May 1;28(1):77–81.
- 868 63. Kimura H, Stephen D, Joyner A, Curran T. Gli1 is important for  
869 medulloblastoma formation in Ptc1+/- mice. *Oncogene* [Internet]. 2005 Jun  
870 4;24(25):4026–36. Available from: <http://www.nature.com/articles/1208567>
- 871 64. Barakat MT, Humke EW, Scott MP. Kif3a is necessary for initiation and  
872 maintenance of medulloblastoma. *Carcinogenesis.* 2013;34(6):1382–92.
- 873 65. Eggenschwiler JT, Bulgakov O V., Qin J, Li T, Anderson K V. Mouse Rab23  
874 regulates Hedgehog signaling from Smoothed to Gli proteins. *Dev Biol*  
875 [Internet]. 2006 Feb 1 [cited 2018 Nov 21];290(1):1–12. Available from:  
876 <https://www.sciencedirect.com/science/article/pii/S0012160605006299?via%3>  
877 *Dihub*
- 878 66. Boehlke C, Bashkurov M, Buescher A, Krick T, John A-K, Nitschke R, et al.  
879 Differential role of Rab proteins in ciliary trafficking: Rab23 regulates  
880 smoothed levels. *J Cell Sci* [Internet]. 2010 May 1;123(Pt 9):1460–7.  
881 Available from: <http://www.ncbi.nlm.nih.gov/pubmed/20375059>
- 882 67. Guo A, Wang T, Ng EL, Aulia S, Chong KH, Teng FYH, et al. Open brain  
883 gene product Rab23: expression pattern in the adult mouse brain and functional  
884 characterization. *J Neurosci Res* [Internet]. 2006;83(6):1118–27. Available  
885 from:  
886 [http://eutils.ncbi.nlm.nih.gov/entrez/eutils/elink.fcgi?dbfrom=pubmed&id](http://eutils.ncbi.nlm.nih.gov/entrez/eutils/elink.fcgi?dbfrom=pubmed&id=16463280&retmode=ref&cmd=prlinks)  
887 [=16463280&retmode=ref&cmd=prlinks](http://eutils.ncbi.nlm.nih.gov/entrez/eutils/elink.fcgi?dbfrom=pubmed&id=16463280&retmode=ref&cmd=prlinks)  
888  
889

## Figure 1

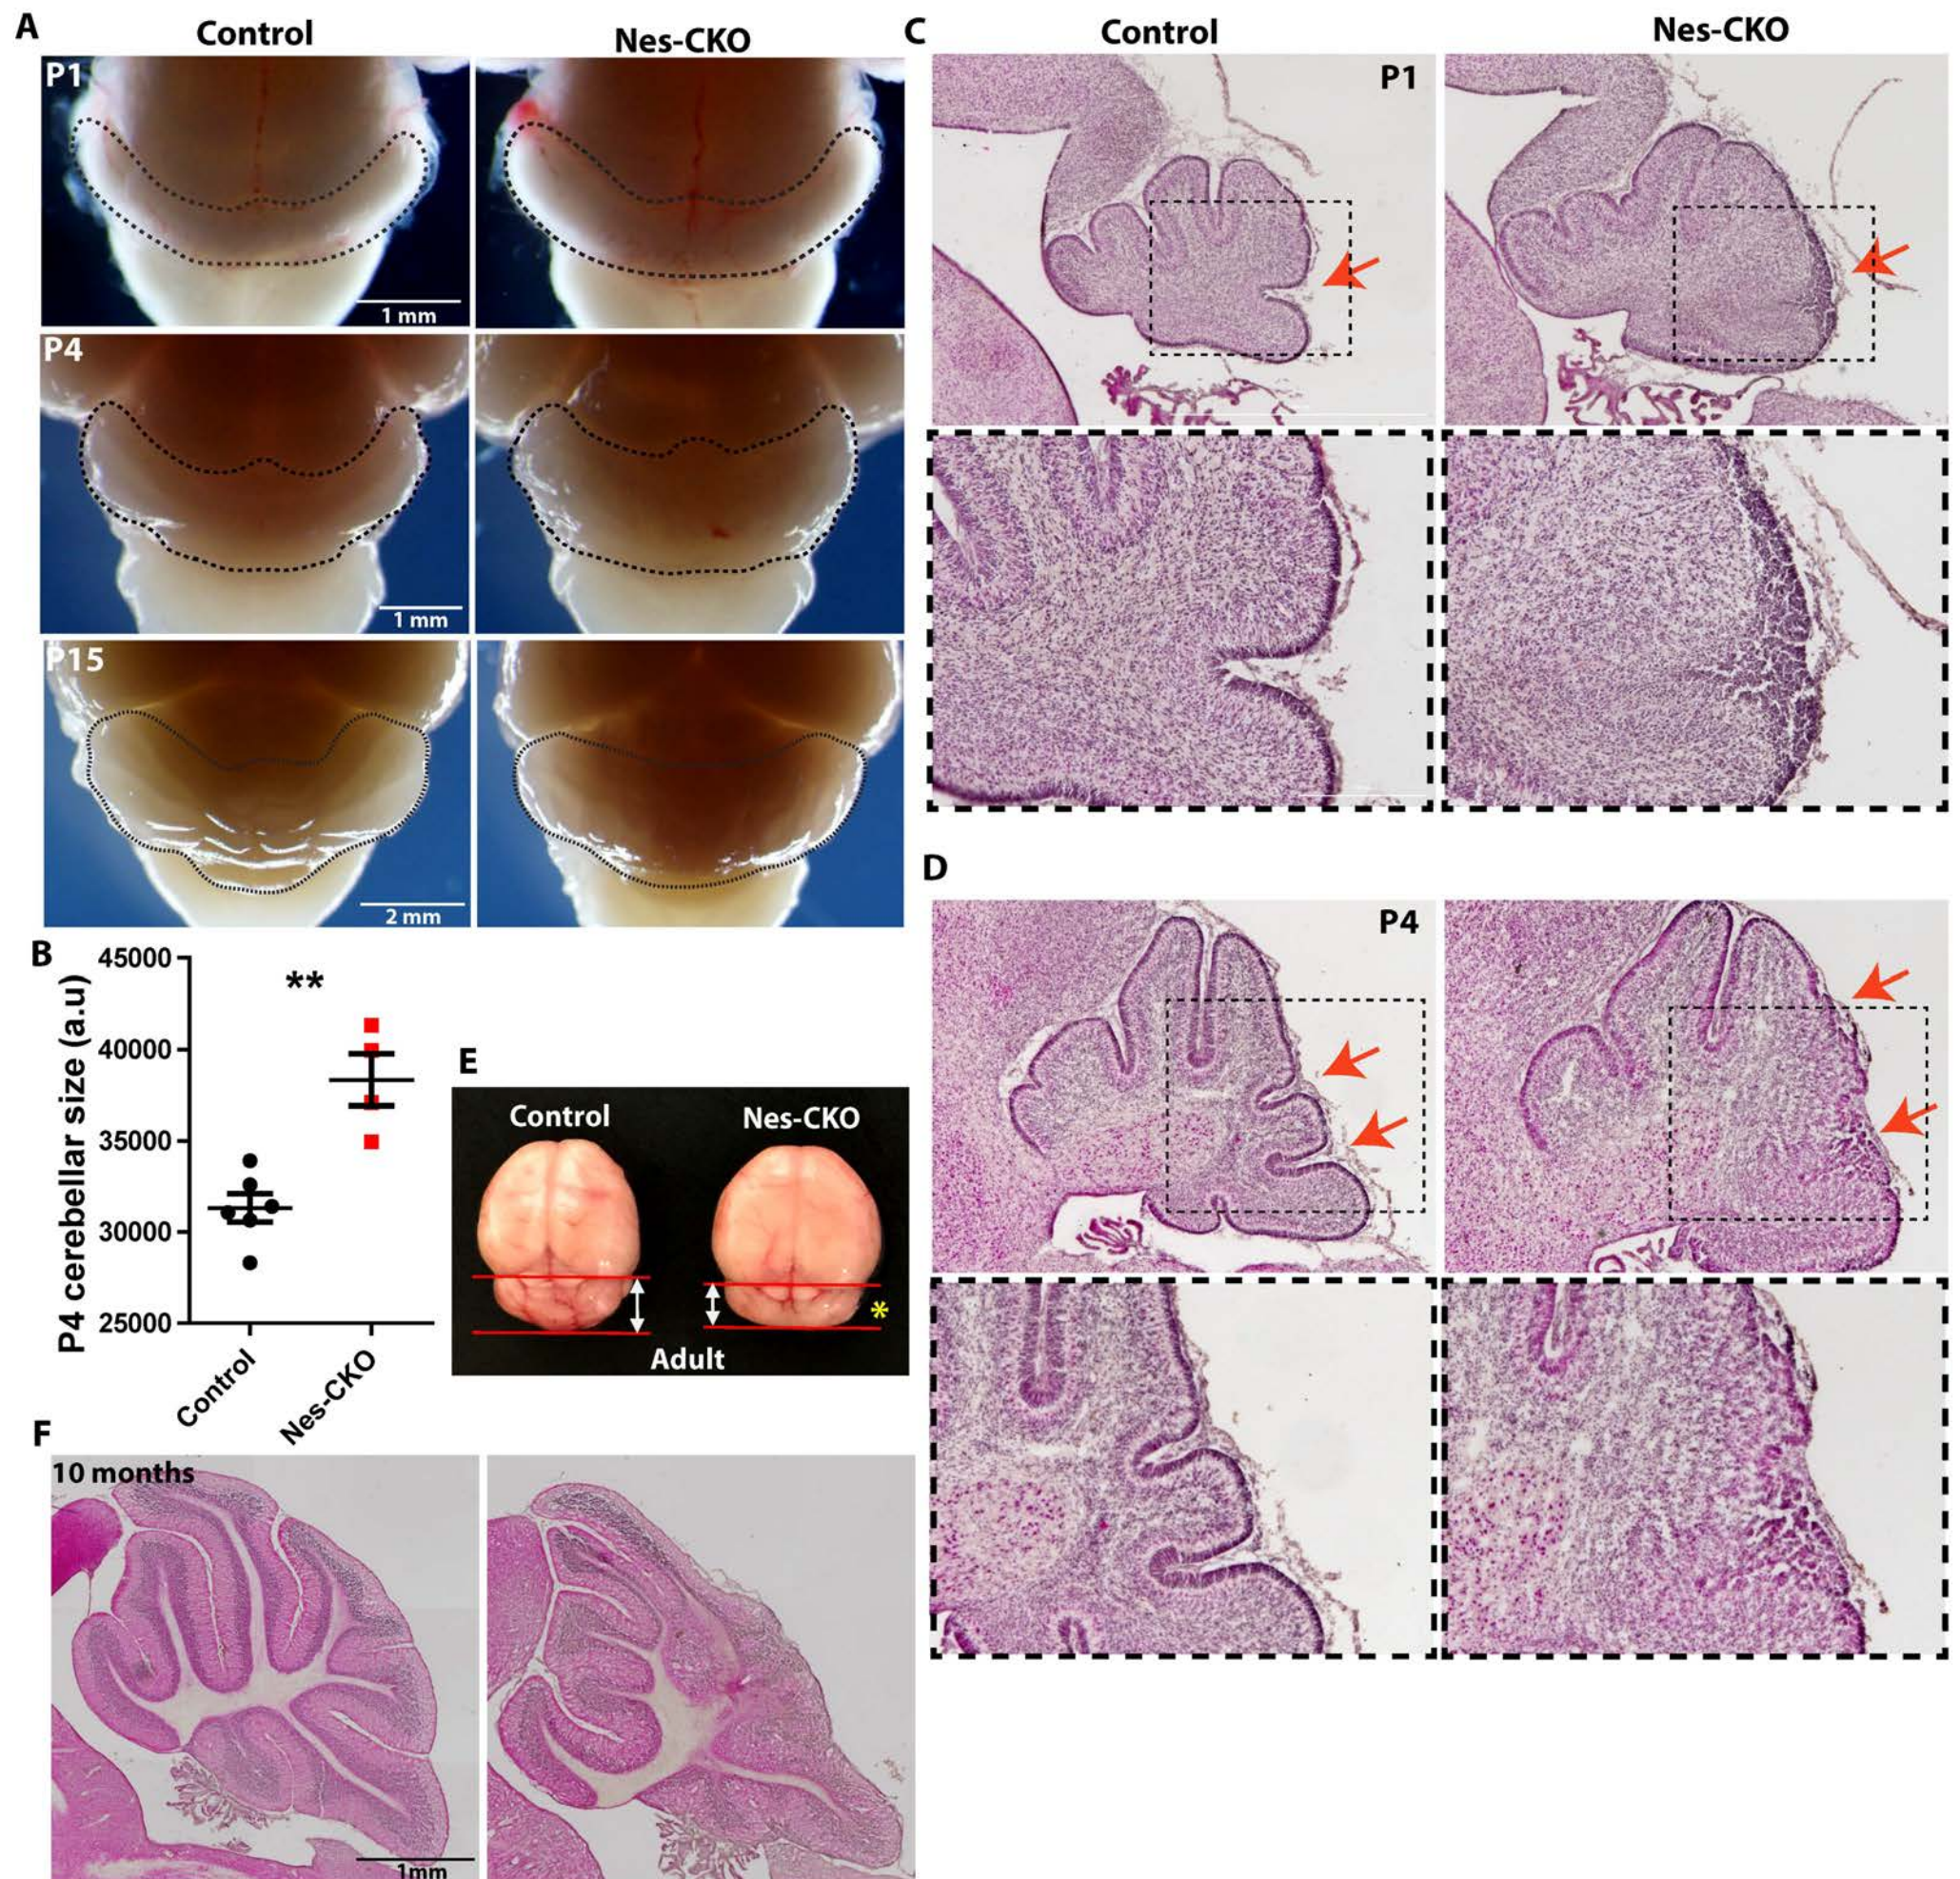

**Figure 2**

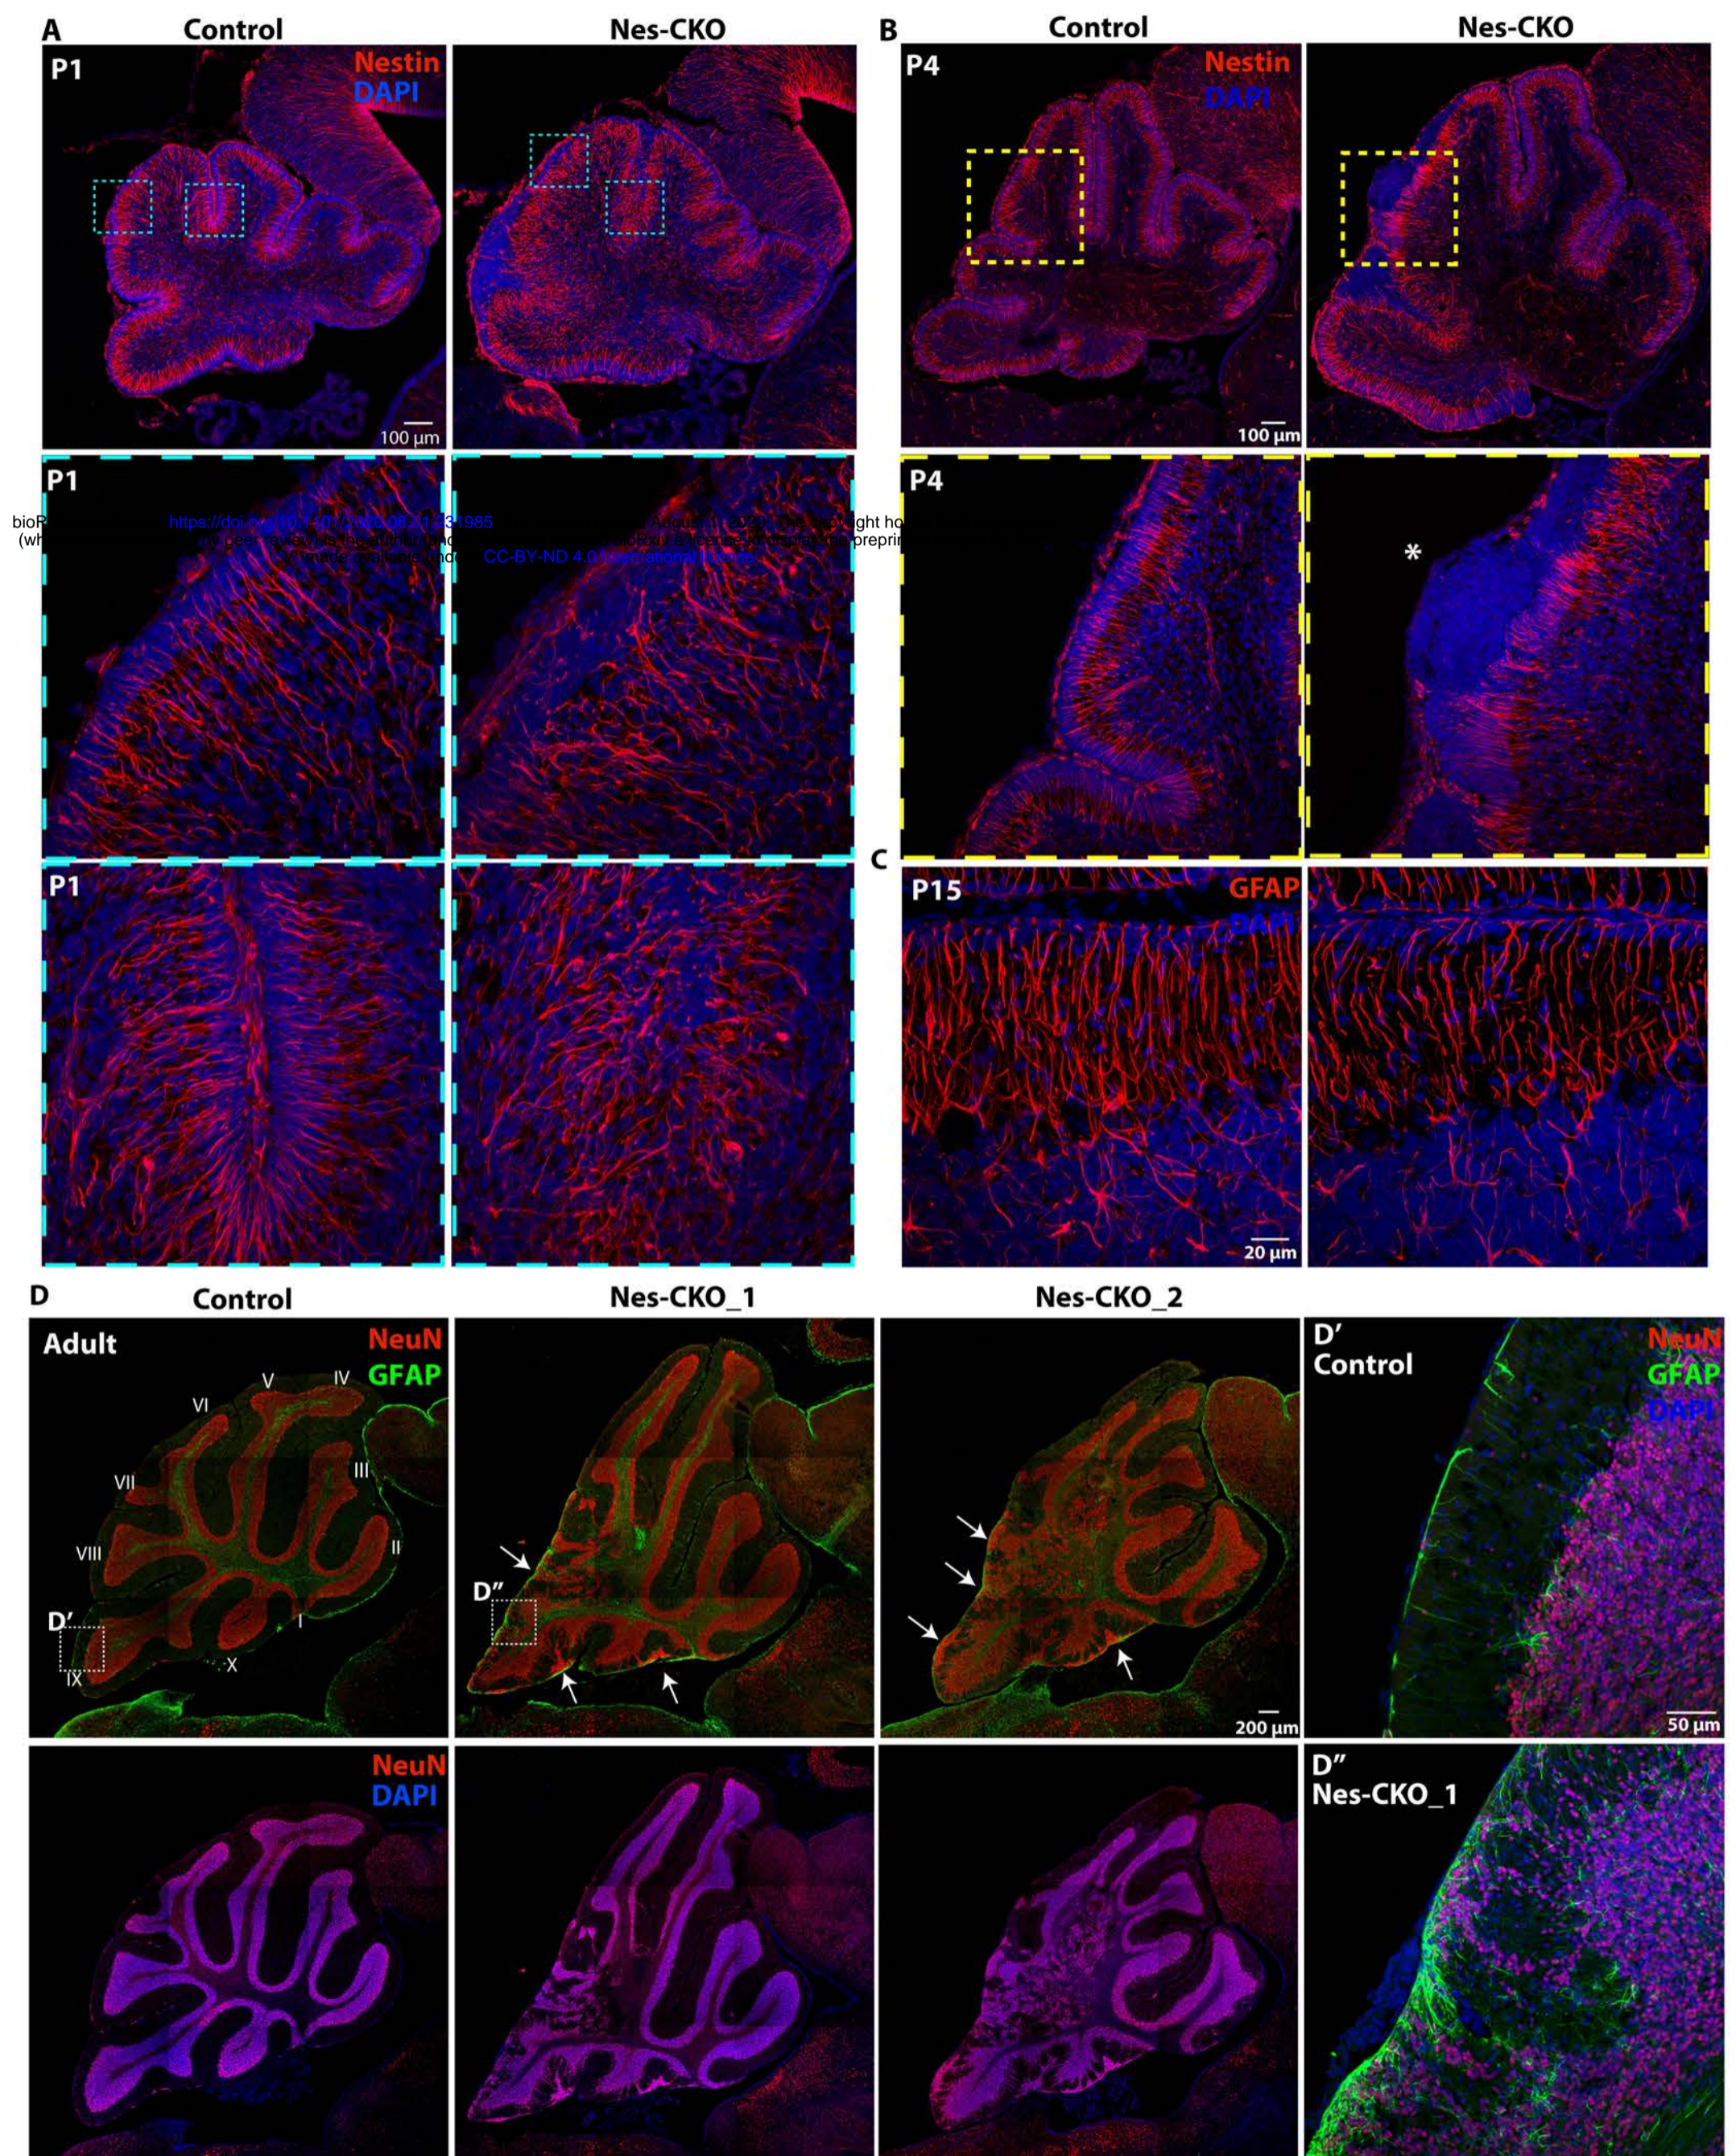

**Figure 3****A**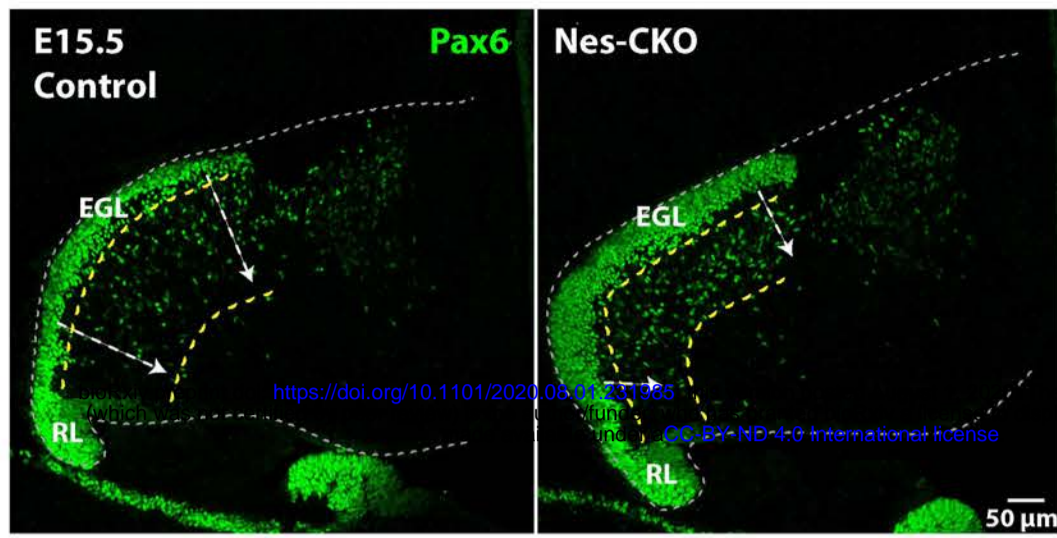**B**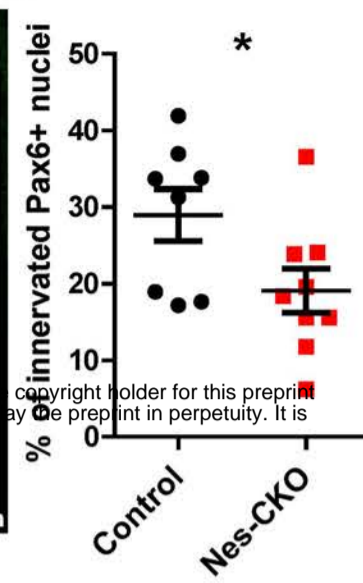**C**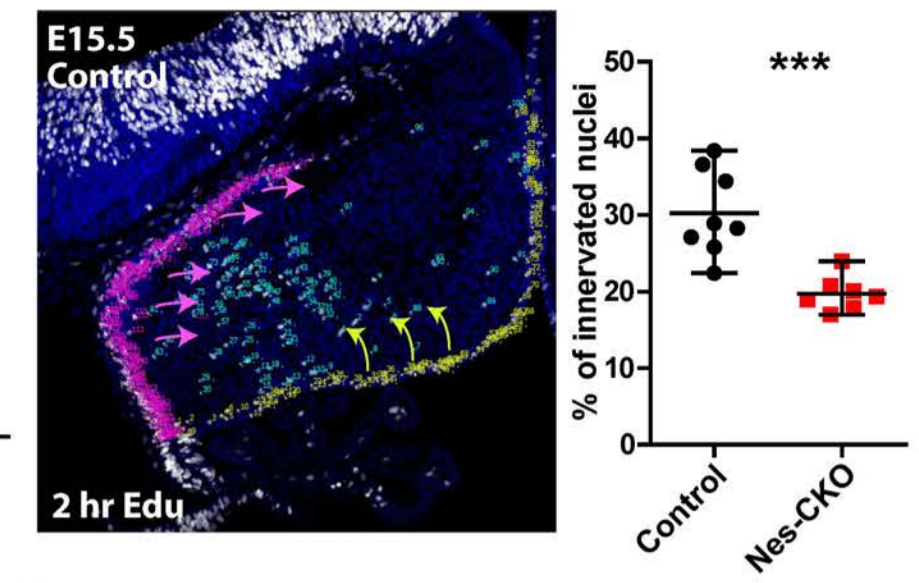**D**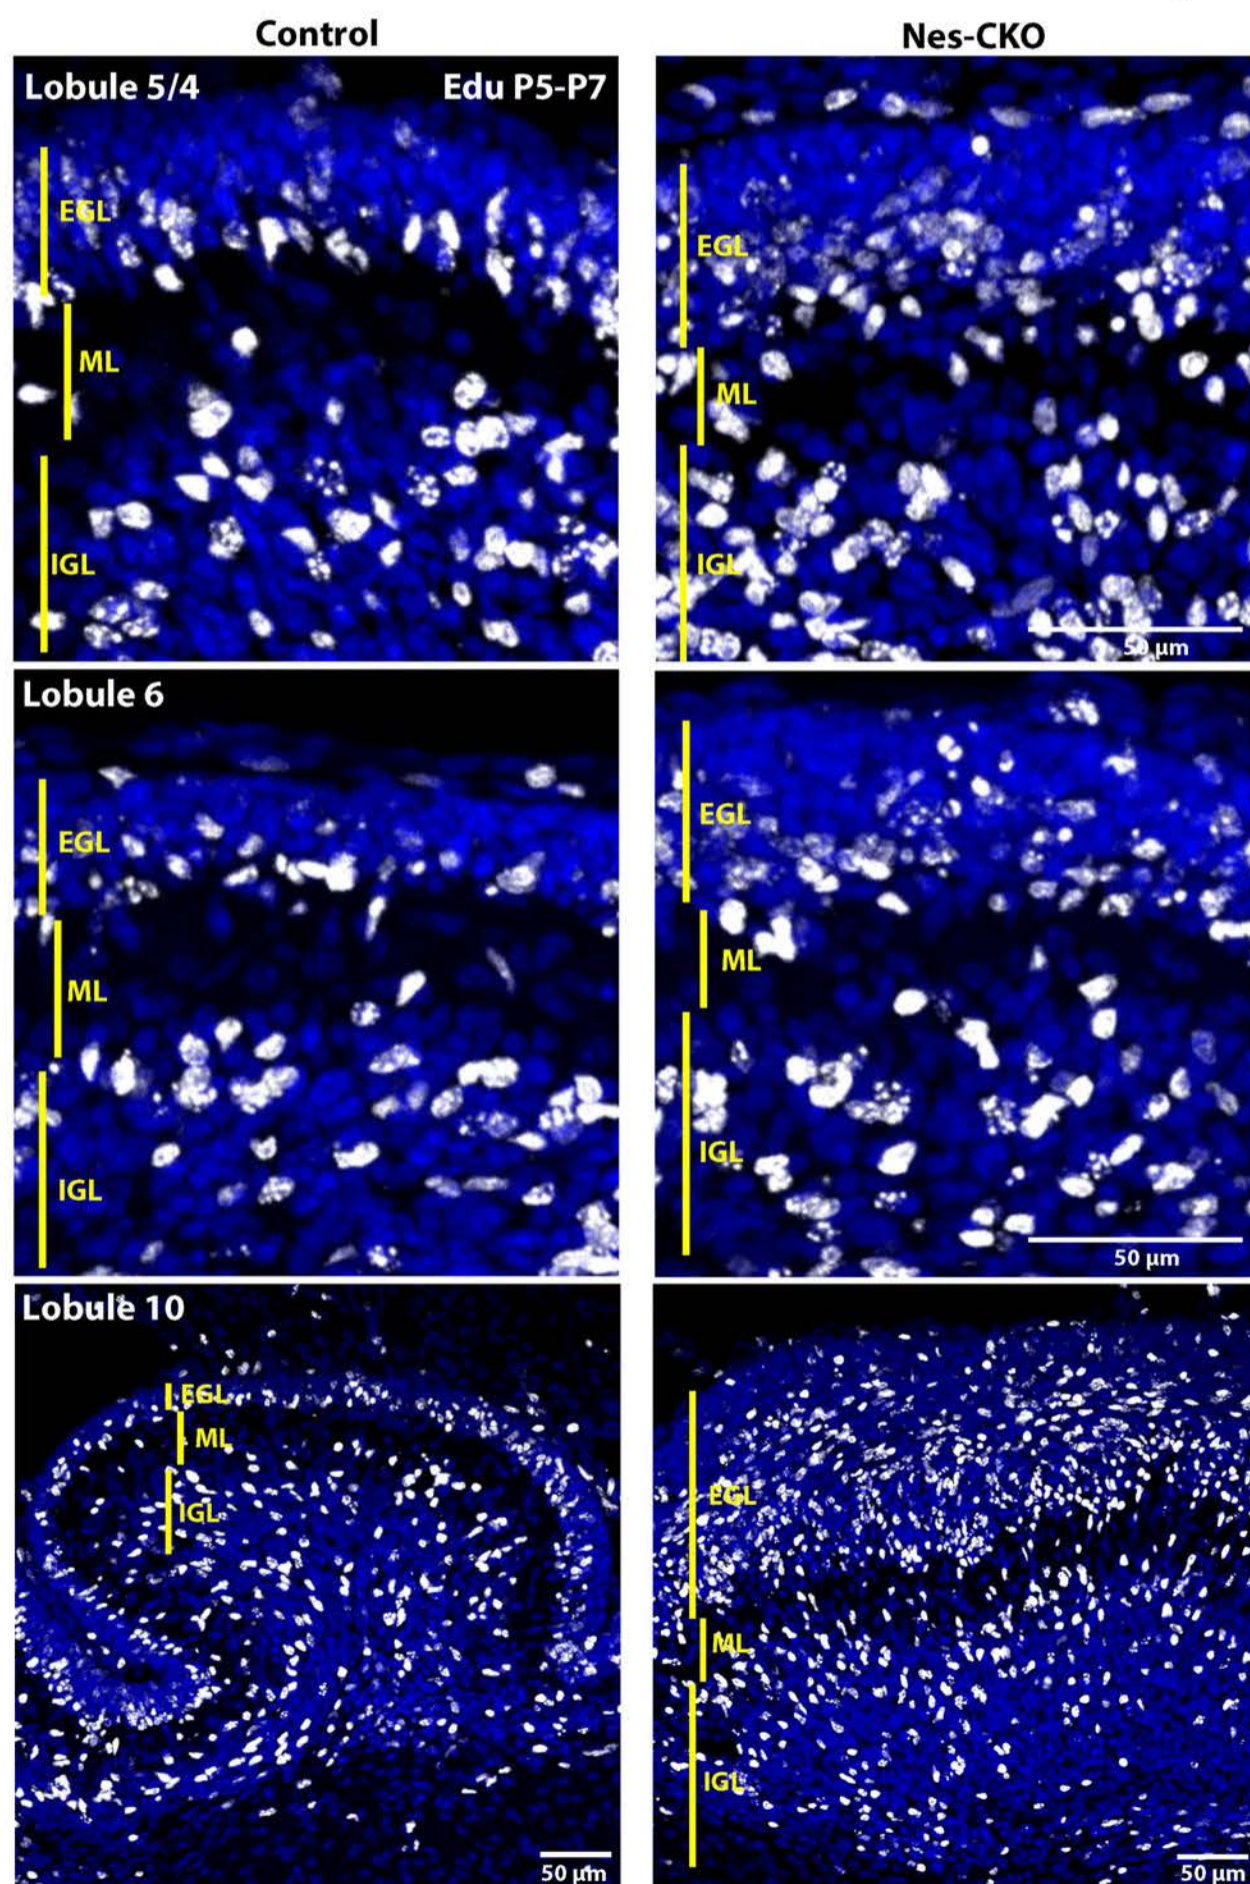**E**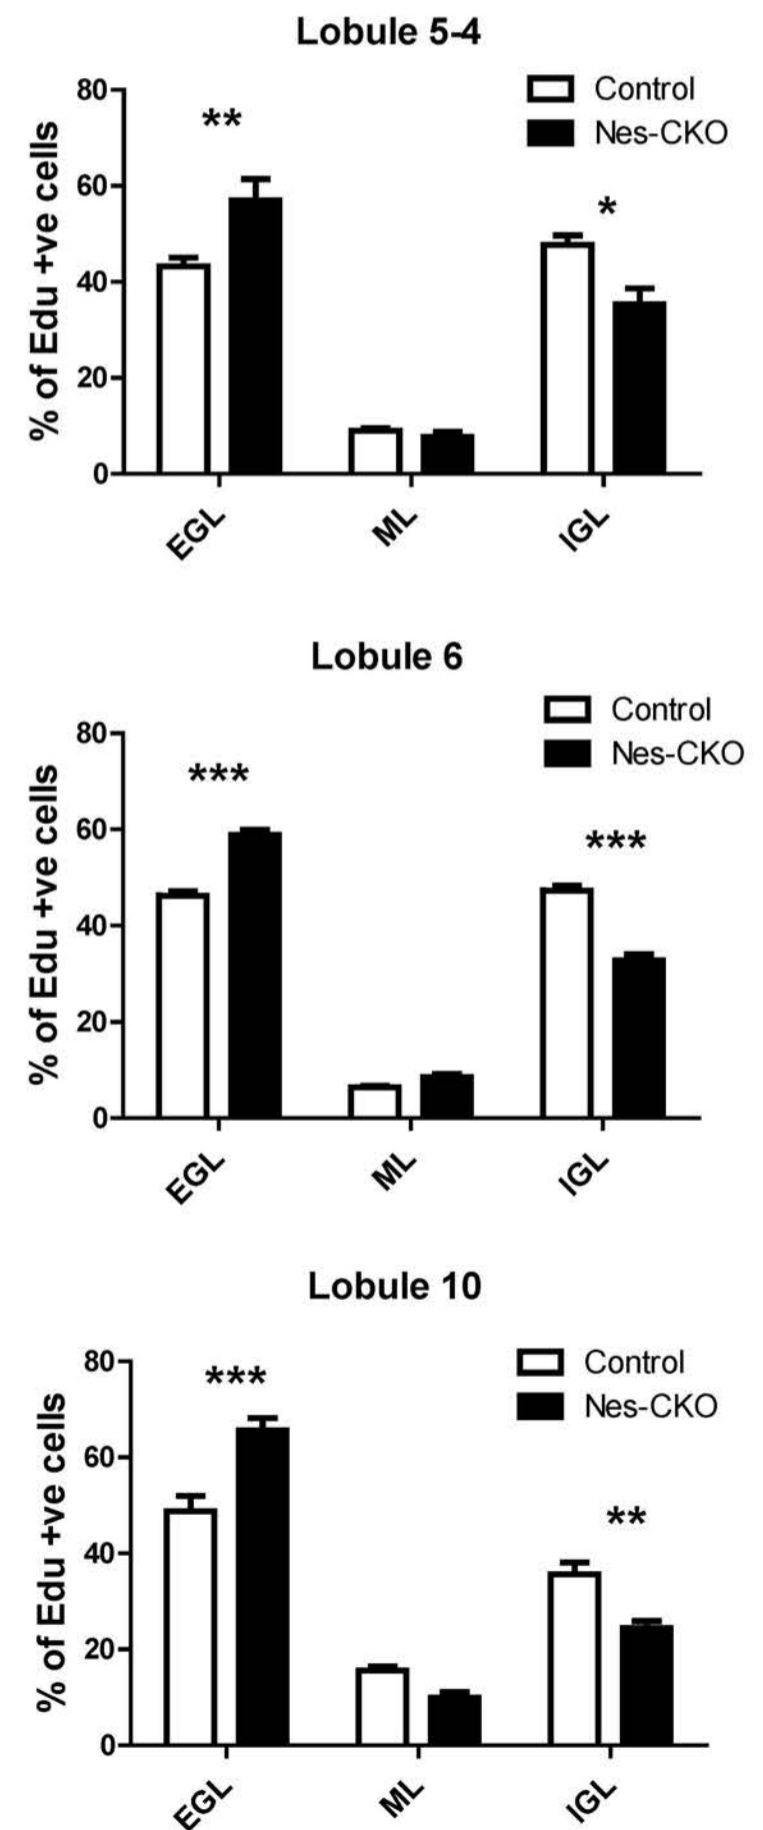

**Figure 4**

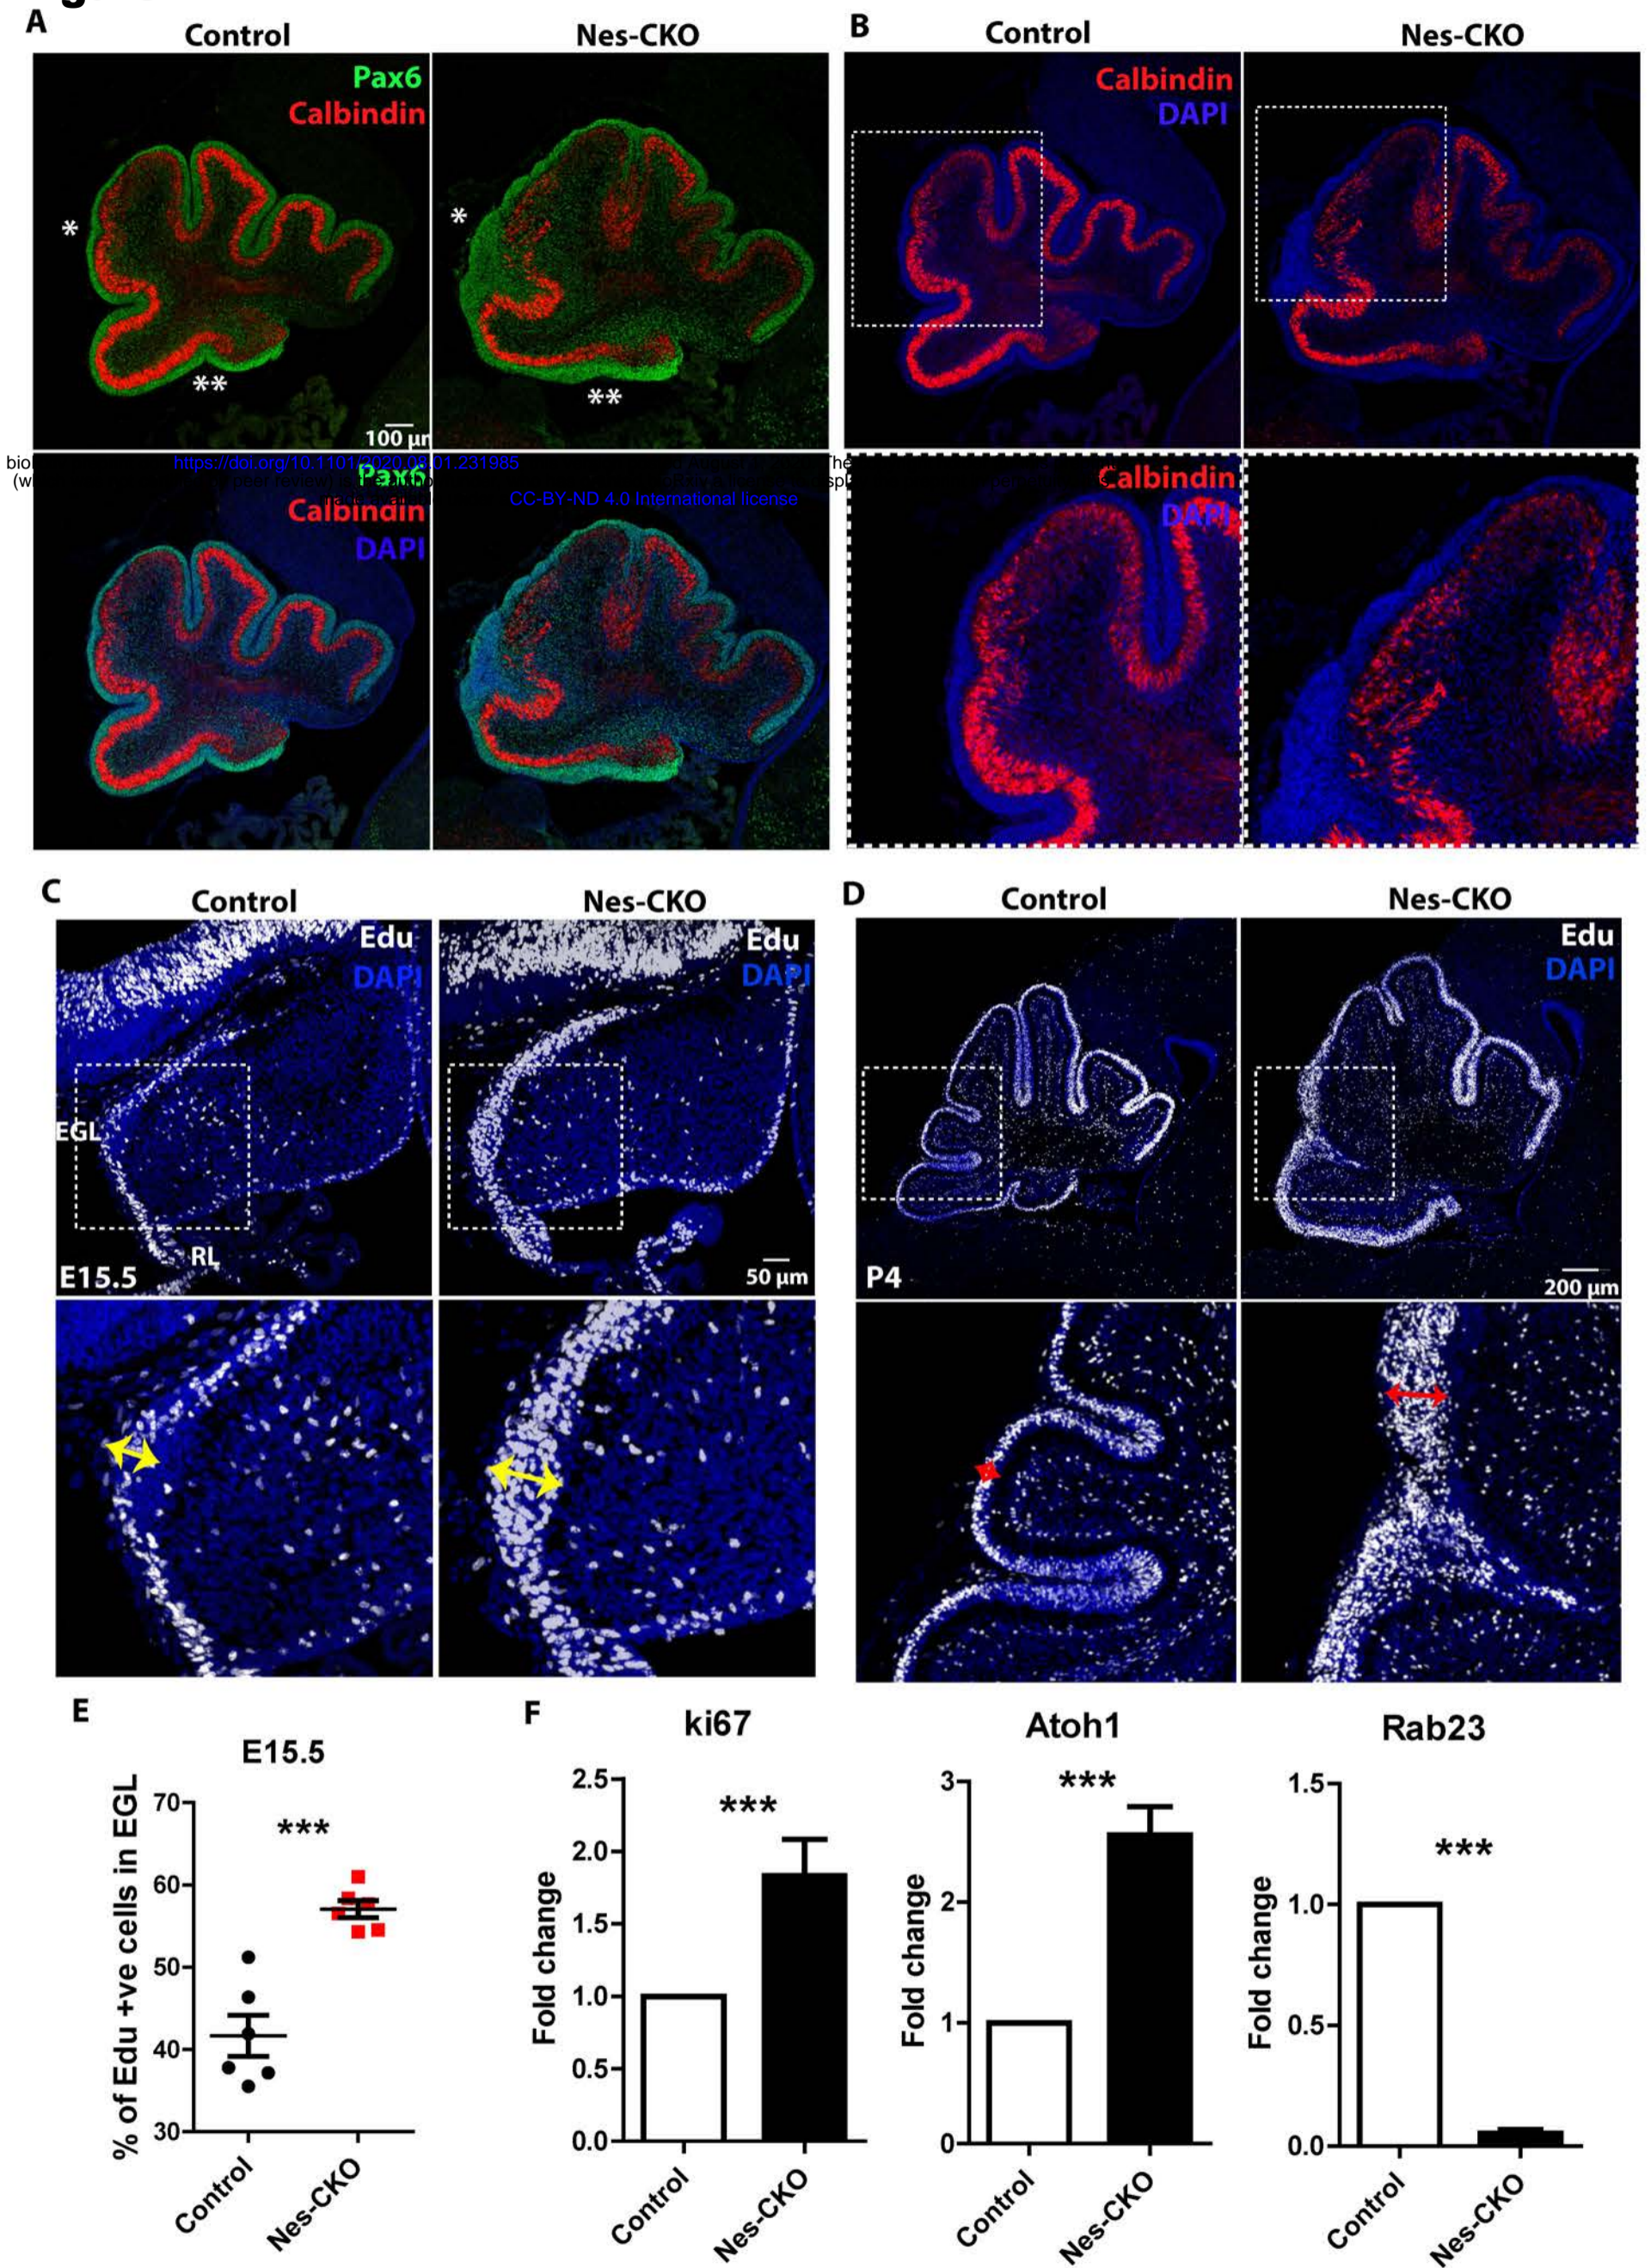

# Figure 5

bioRxiv preprint doi: <https://doi.org/10.1101/2020.08.01.231985>; this version posted August 1, 2020. The copyright holder for this preprint (which was not certified by peer review) is the author/funder, who has granted bioRxiv a license to display the preprint in perpetuity. It is made available under a [CC-BY-ND 4.0 International license](https://creativecommons.org/licenses/by-nd/4.0/).

## A E15.5

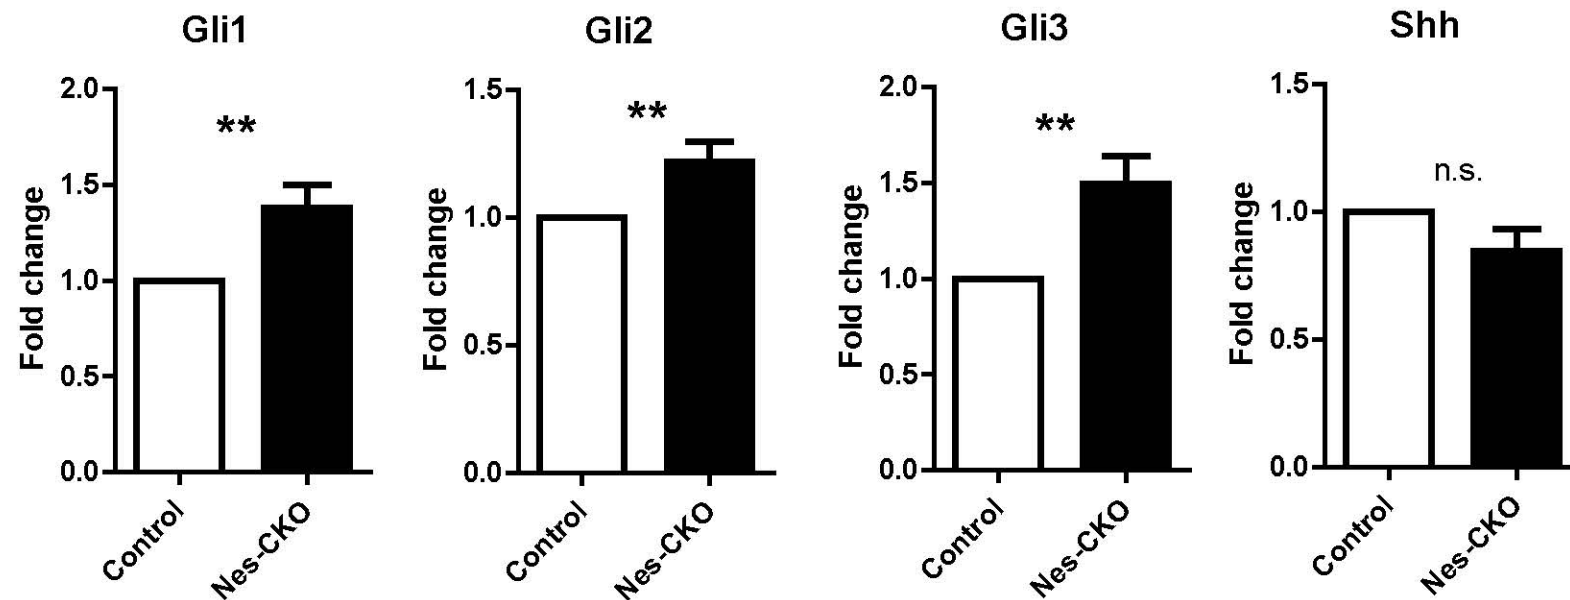

## B P15

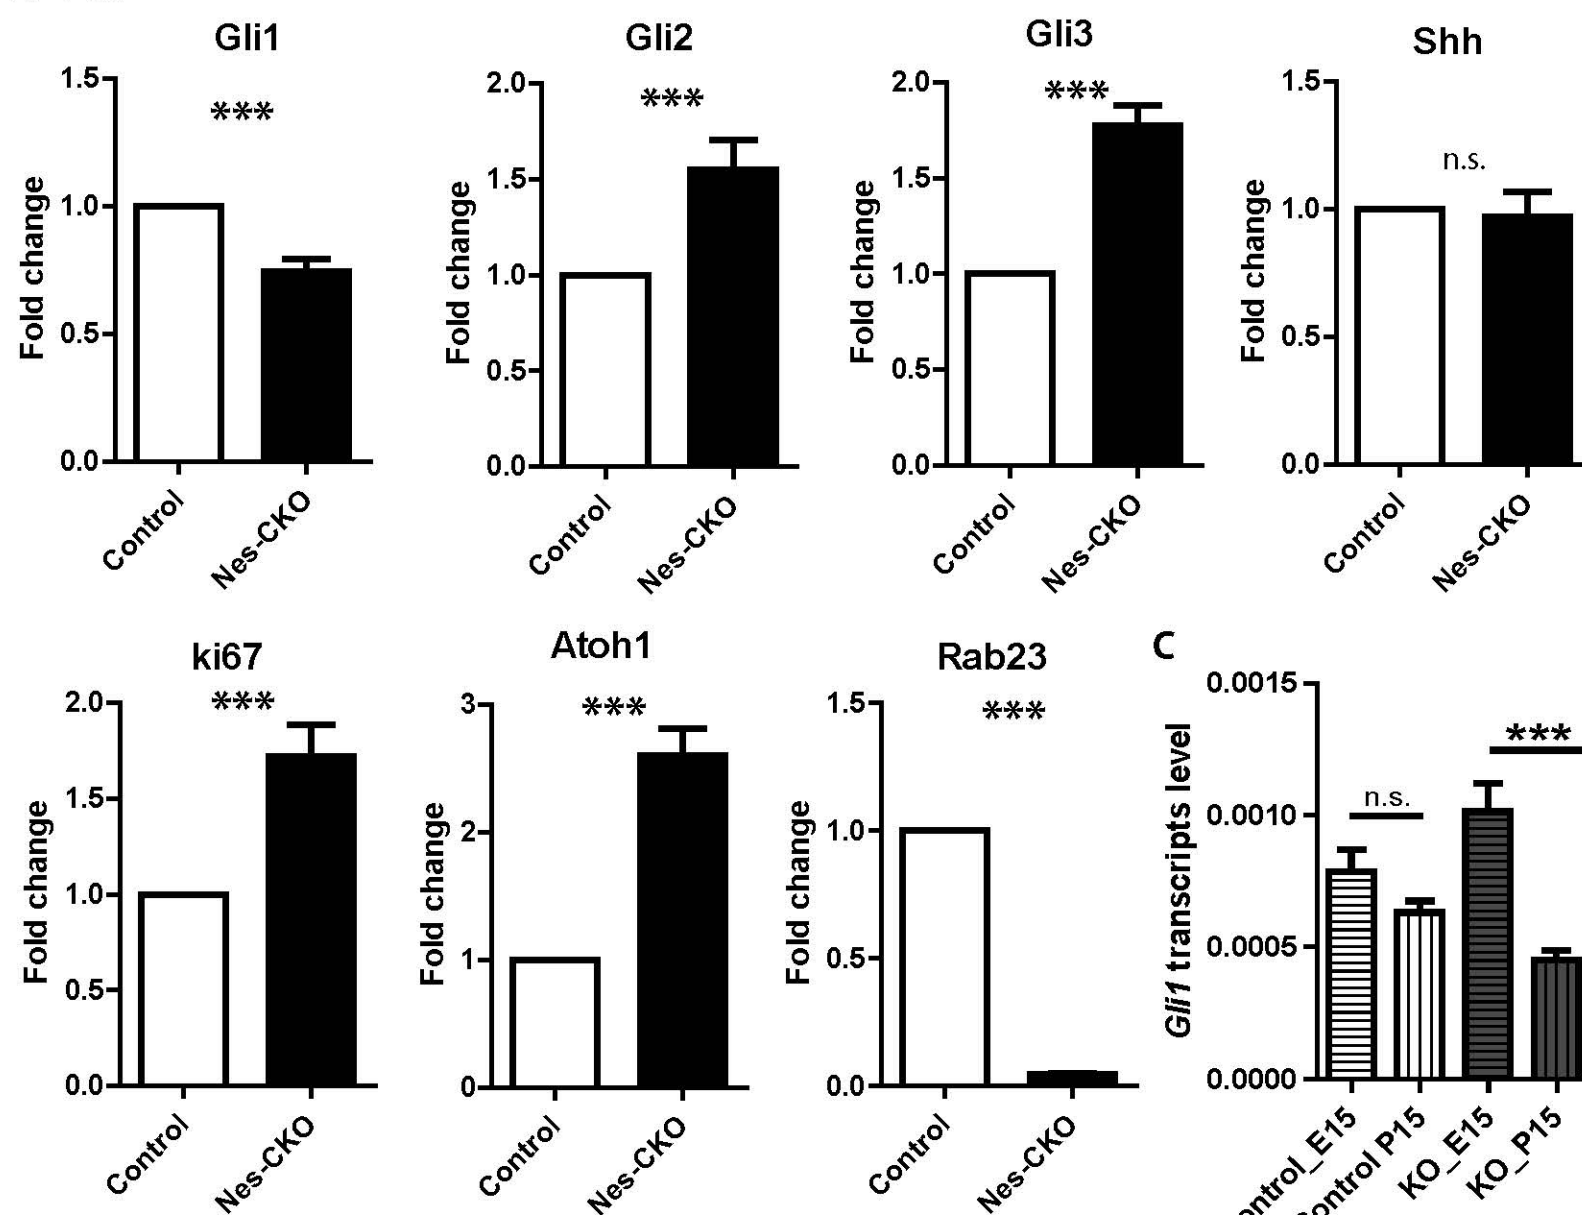

## C

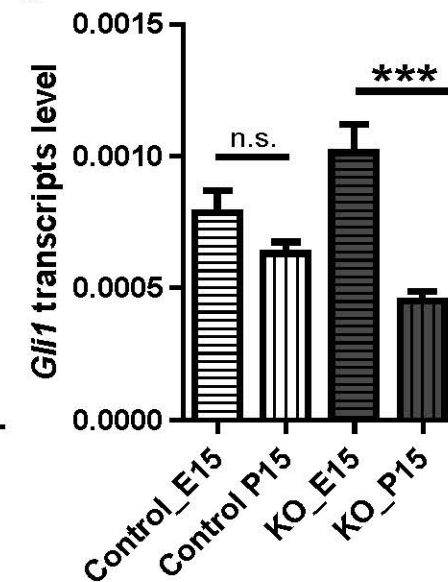

**Figure 6****A**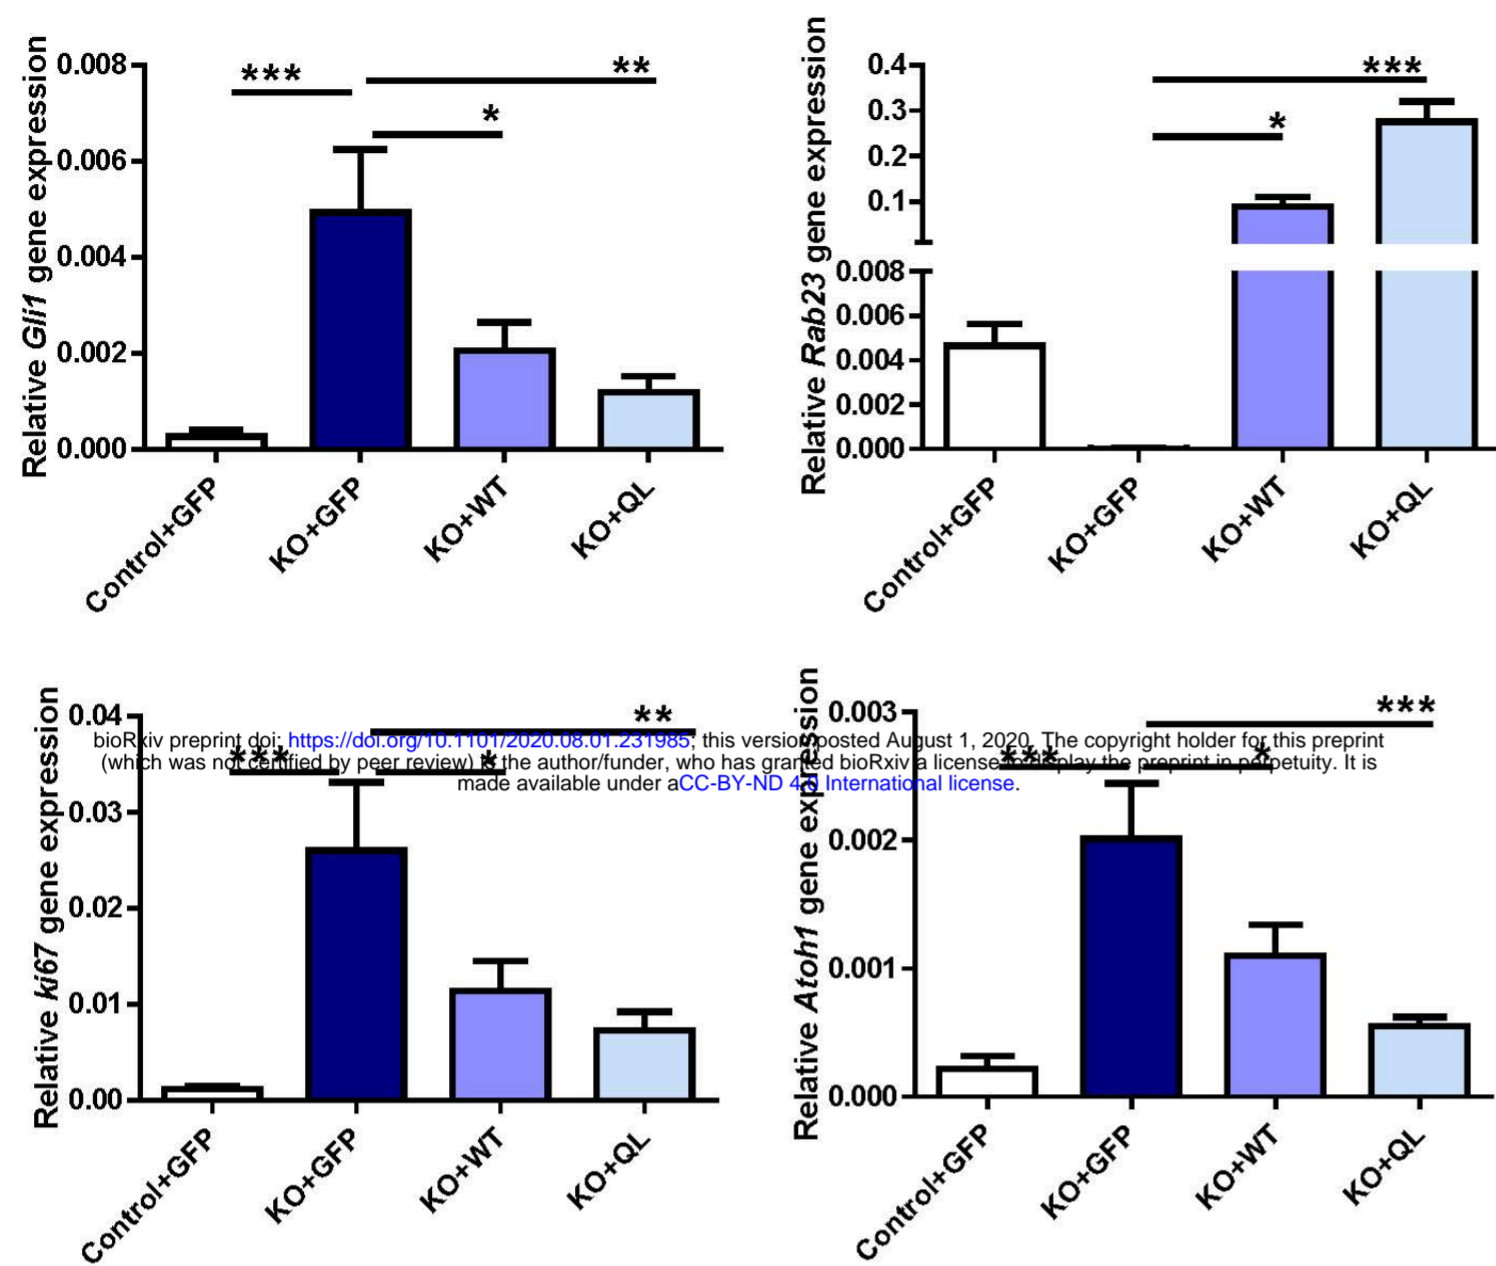**B**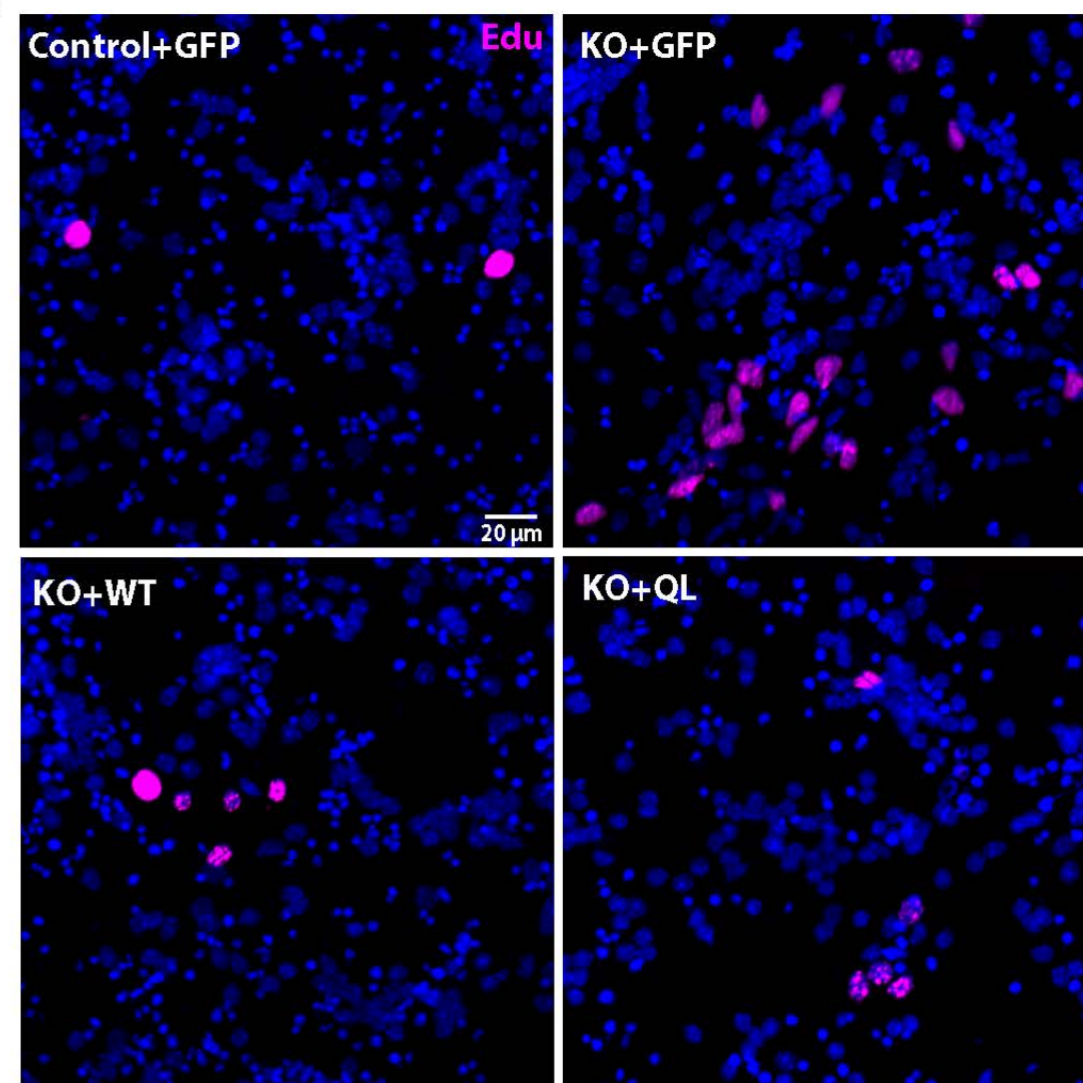**E**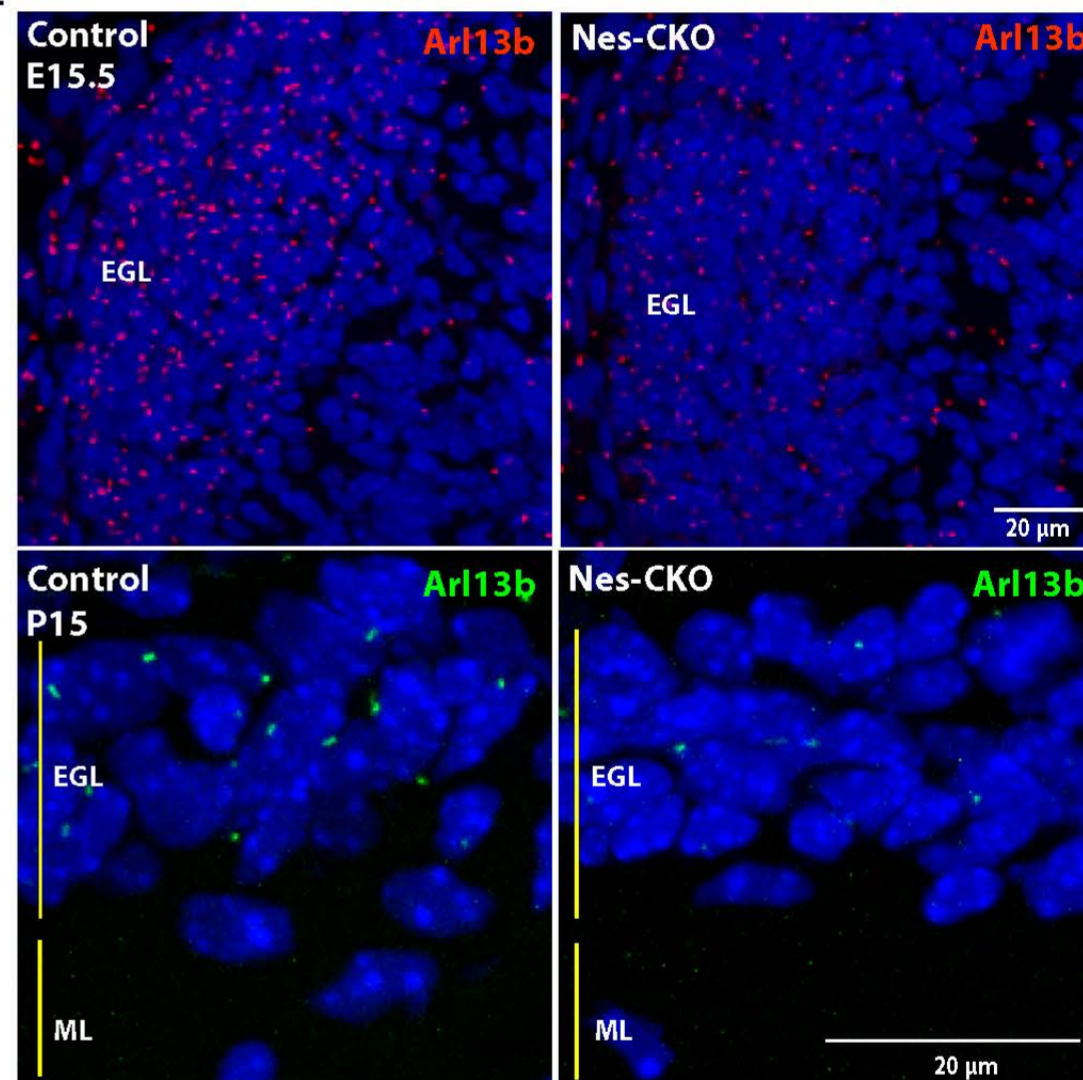**C**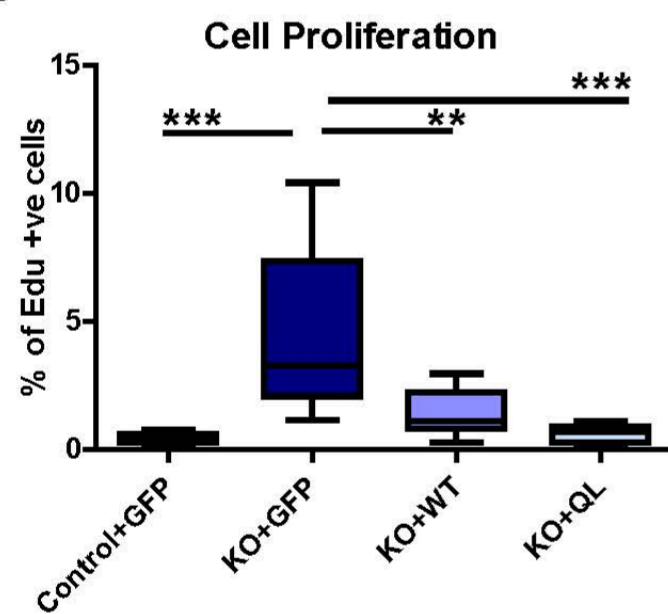**D**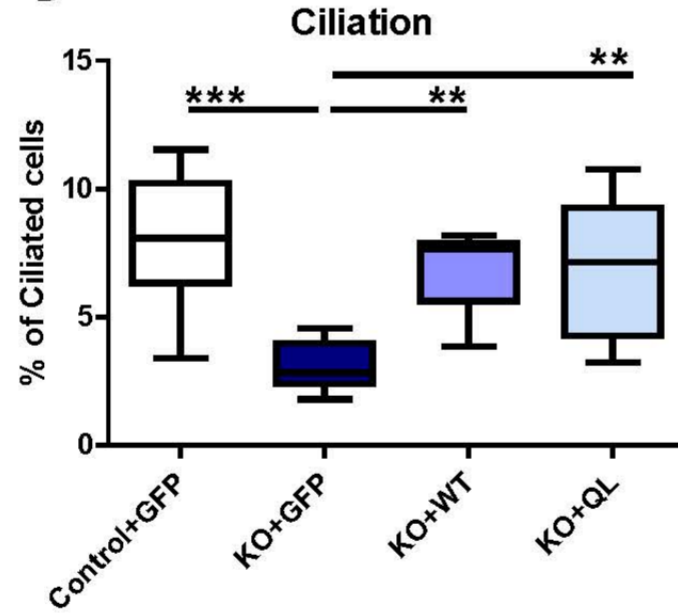**F**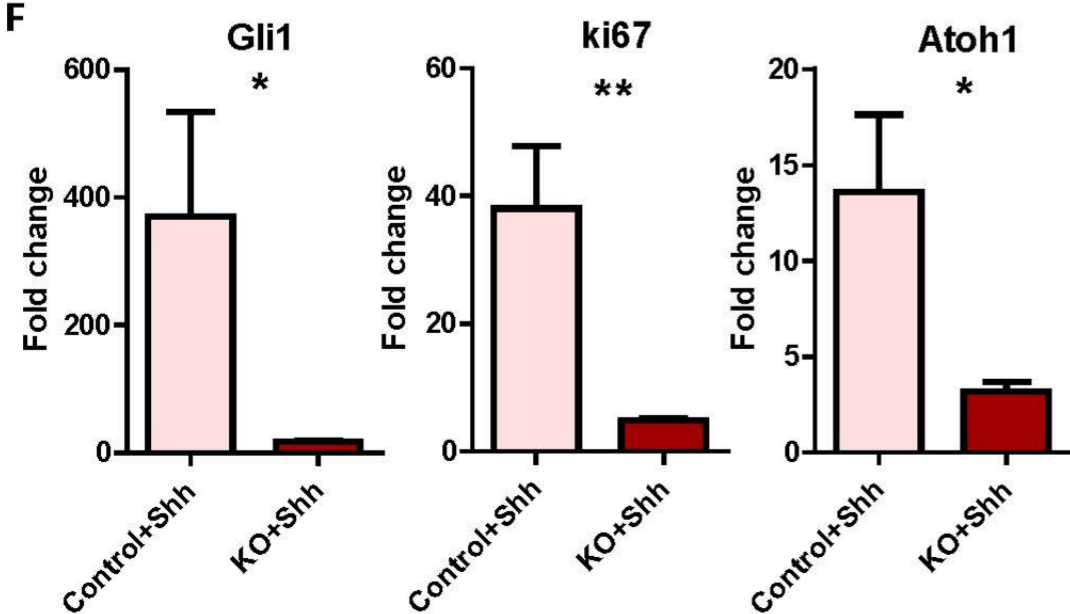**G**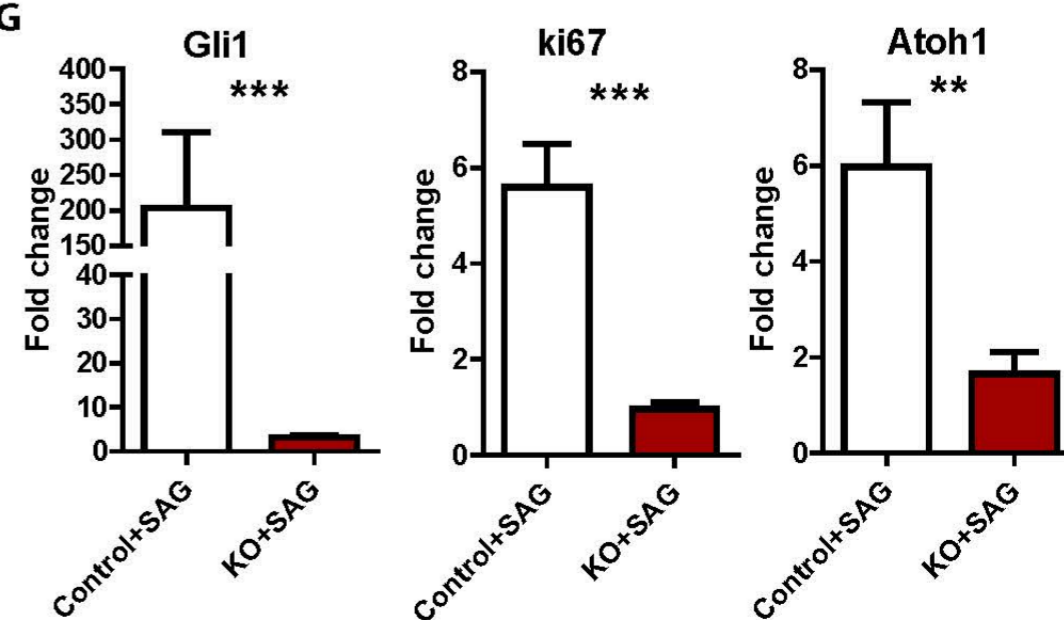

Figure 7

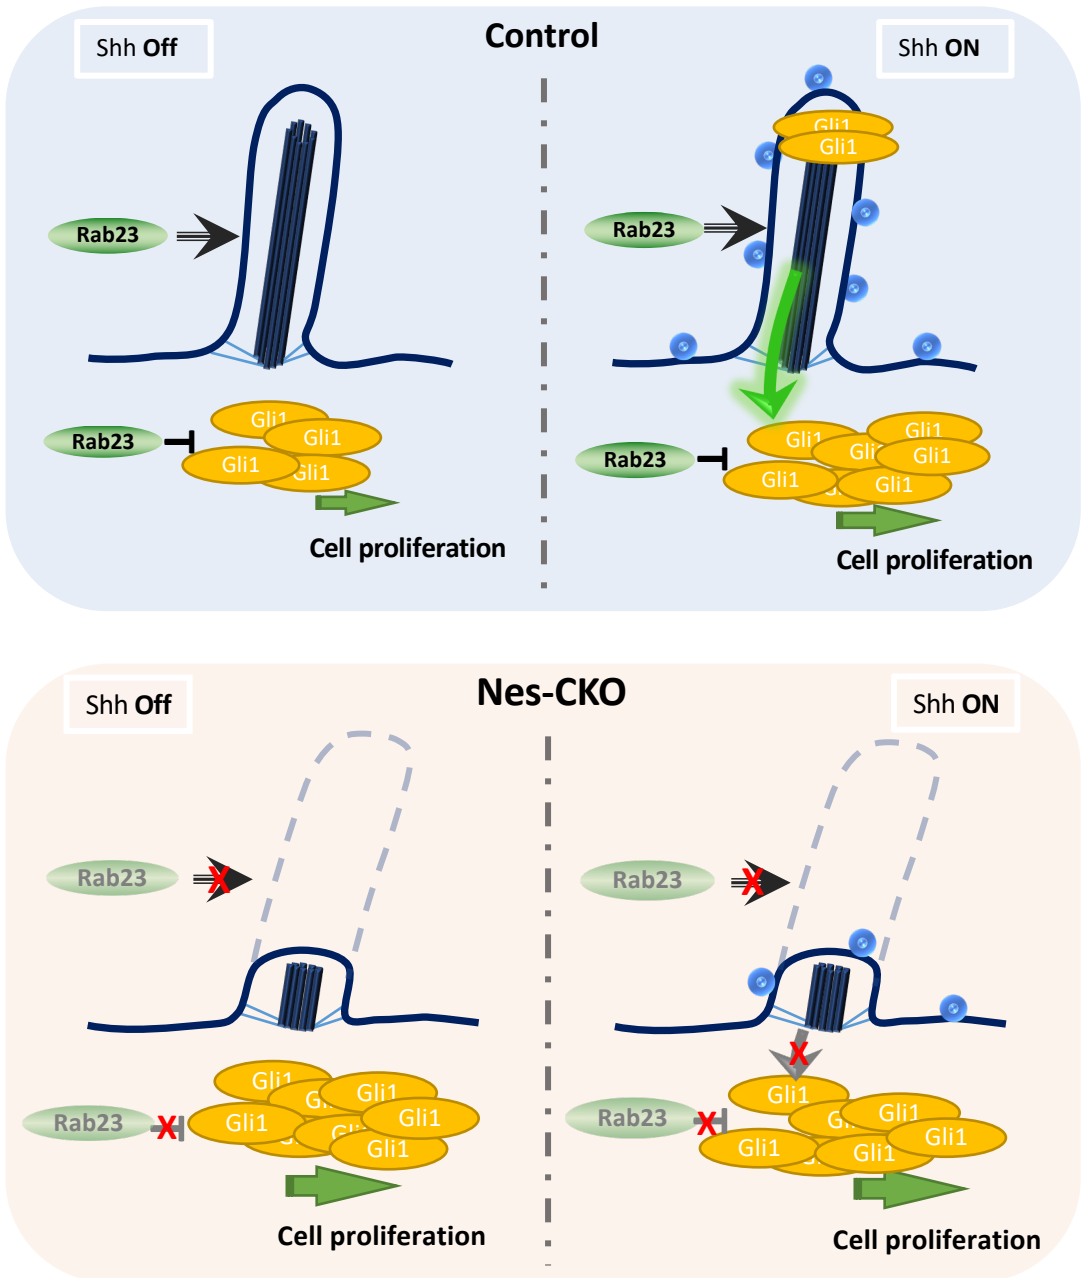

Source: https://www.biorxiv.org/content/10.1101/2020.08.01.231985v1.full.pdf
